# Supplementary material for: Terrosamycins A and B, Bioactive Polyether Ionophores from Streptomyces sp. RKND004 from Prince Edward Island Sediment
Source: PubMed Central journal article supplement (PMC6627438; doi:10.3390/md17060347), 2019-06-11
Supplement: marinedrugs-17-00347-s001.pdf [file marinedrugs-17-00347-s001.pdf]

## *Supplementary materials*

# **Terrosamycins A and B, Bioactive Polyether Ionophores from *Streptomyces* sp. RKND004 from Prince Edward Island Sediment**

**Amanda Sproule<sup>1</sup>, Hebelin Correa<sup>2</sup>, Andreas Decken<sup>3</sup>, Bradley Haltli<sup>2,4</sup>, Fabrice Berrue<sup>1</sup>, David P. Overy<sup>5</sup> and Russell G. Kerr<sup>1,2,4,\*</sup>**

<sup>1</sup> Department of Chemistry, University of Prince Edward Island, 550 University Avenue, Charlottetown, Prince Edward Island, Canada C1A 4P3; [amanda.sproule@canada.ca](mailto:amanda.sproule@canada.ca) (A.S.); [fabrice.berrue@nrc-cnrc.gc.ca](mailto:fabrice.berrue@nrc-cnrc.gc.ca) (F.B.)

<sup>2</sup> Nautilus Biosciences Croda, 550 University Avenue, Charlottetown, Prince Edward Island, Canada C1A 4P3; [hebelin.correa@croda.com](mailto:hebelin.correa@croda.com) (H.C.); [bradley.haltli@croda.com](mailto:bradley.haltli@croda.com) (B.H.)

<sup>3</sup> Department of Chemistry, University of New Brunswick, 30 Dineen Drive, Fredericton, New Brunswick, Canada E3B 5A3; [adecken@unb.ca](mailto:adecken@unb.ca)

<sup>4</sup> Department of Biomedical Science, Atlantic Veterinary College, University of Prince Edward Island, 550 University Avenue, Charlottetown, Prince Edward Island, Canada C1A 4P3

<sup>5</sup> Department of Pathology and Microbiology, Atlantic Veterinary College, University of Prince Edward Island, 550 University Avenue, Charlottetown, Prince Edward Island, Canada C1A 4P3; [david.overy@canada.ca](mailto:david.overy@canada.ca)

\* Correspondence: [rkerr@upeu.ca](mailto:rkerr@upeu.ca); Tel.: +1-902-566-0565

Table S1. Production media recipes

Figure S1. Extracted ion chromatograms monitoring **1** in extracts from cultures in all media

Figure S2. +ESIMS and -ESIMS spectrum of **1**

Figure S3. +ESIMS and -ESIMS spectrum of **2**

Figure S4.  $^1\text{H}$  NMR spectrum of **1**

Figure S5.  $^{13}\text{C}$  NMR spectrum of **1**

Figure S6. COSY spectrum of **1**

Figure S7. HSQC spectrum of **1**

Figure S8. HMBC spectrum of **1**

Figure S9. IR spectrum of **1**

Figure S10.  $^1\text{H}$  NMR spectrum of **2**

Figure S11.  $^{13}\text{C}$  NMR spectrum of **2**

Figure S12. COSY spectrum of **2**

Figure S13. HQSC spectrum of **2**

Figure S14. HMBC spectrum of **2**

Figure S15. IR spectrum of **2**

Figure S16. Extracted ion chromatogram for **2** in a crude extract analyzed without methanol

Table S2. Crystal data and structure refinement for **1**

Table S3. Atomic coordinates ( $\times 10^4$ ) and equivalent isotropic displacement parameters for **1**

Table S4. Bond lengths [ $\text{\AA}$ ] and angles [ $^\circ$ ] for **1**

Table S5. Anisotropic displacement parameters ( $\text{\AA}^2 \times 10^3$ ) for **1**

Table S6. Hydrogen coordinates ( $\times 10^4$ ) and isotropic displacement parameters ( $\text{\AA}^2 \times 10^3$ ) for **1**

Table S7. Hydrogen bonds for terrosamycin A (**1**) [ $\text{\AA}$  and  $^\circ$ ]

Table S1. Production media recipes

| Medium     | Ingredient                     | Quantity (g/L Milli-Q diH <sub>2</sub> O, unless otherwise stated) | Specified pH ( $\pm 0.2$ ) |
|------------|--------------------------------|--------------------------------------------------------------------|----------------------------|
| ISP2 [15]  | yeast extract                  | 2                                                                  | -                          |
|            | malt extract                   | 5                                                                  |                            |
|            | dextrose                       | 2                                                                  |                            |
| BFM1 [16]  | dextrin                        | 20                                                                 | -                          |
|            | soluble starch                 | 20                                                                 |                            |
|            | beef extract                   | 10                                                                 |                            |
|            | tryptone                       | 5                                                                  |                            |
|            | ammonium sulfate               | 2                                                                  |                            |
|            | calcium carbonate              | 2                                                                  |                            |
| BFM2 [17]  | soluble starch                 | 5                                                                  | -                          |
|            | Pharmamedia                    | 5                                                                  |                            |
| BFM3* [18] | magnesium sulfate heptahydrate | 0.5                                                                | -                          |
|            | potassium chloride             | 0.5                                                                |                            |
|            | dipotassium phosphate          | 3                                                                  |                            |
|            | sodium chloride                | 5                                                                  |                            |
|            | nutrient agar                  | 0.4                                                                |                            |
|            | glycerol                       | 12                                                                 |                            |
|            | Bacto <sup>TM</sup> soytone    | 5                                                                  |                            |
| BFM4 [19]  | toasted Nutrisoy flour         | 12                                                                 | 6.8                        |
|            | ammonium chloride              | 1                                                                  |                            |
|            | dextrose                       | 12                                                                 |                            |
|            | nutrient agar                  | 0.4                                                                |                            |
|            | calcium carbonate              | 1                                                                  |                            |
|            | N-Z Amine A                    | 3                                                                  |                            |
| BFM5 [20]  | tryptone                       | 17                                                                 | 7.3                        |
|            | Bacto soytone                  | 3                                                                  |                            |
|            | sodium chloride                | 5                                                                  |                            |
|            | dipotassium phosphate          | 2.5                                                                |                            |
|            | dextrose                       | 2.5                                                                |                            |

|            |                                      |         |     |
|------------|--------------------------------------|---------|-----|
| BFM6       | yeast extract                        | 5       | 7.3 |
|            | tryptone                             | 5       |     |
|            | iron (II) chloride tetrahydrate      | 0.04    |     |
|            | manganese (II) sulfate monohydrate   | 0.00034 |     |
|            | magnesium sulfate heptahydrate       | 5       |     |
|            | sodium chloride                      | 58.44   |     |
|            |                                      |         |     |
| BFM7* [21] | potassium phosphate                  | 1       | 7.3 |
|            | dipotassium phosphate                | 1       |     |
|            | magnesium sulfate heptahydrate       | 0.2     |     |
|            | iron (III) chloride                  | 0.05    |     |
|            | calcium chloride dihydrate           | 0.02    |     |
|            | sodium chloride                      | 5       |     |
|            | glucose                              | 2       |     |
|            | yeast extract                        | 2       |     |
| olive oil  | 5                                    |         |     |
| BFM8* [22] | tryptone                             | 5       | 7.6 |
|            | yeast extract                        | 1       |     |
|            | ferric citrate                       | 0.1     |     |
| BFM9 [23]  | yeast extract                        | 5       | 6.8 |
|            | casamino acids                       | 0.1     |     |
|            | glucose                              | 10      |     |
|            | sucrose                              | 100     |     |
|            | potassium sulfate                    | 0.25    |     |
|            | magnesium chloride hexahydrate       | 10.2    |     |
|            | MOPS sodium salt                     | 21      |     |
|            |                                      |         |     |
| BFM10 [24] | glycerol                             | 10      | 7.0 |
|            | soybean flour                        | 20      |     |
|            | corn oil                             | 20      |     |
|            | dipotassium phosphate                | 1.2     |     |
|            | MOPS buffer                          | 21      |     |
|            | manganese (II) chloride heptahydrate | 0.01    |     |
|            | iron (II) sulfate heptahydrate       | 0.01    |     |
|            | zinc sulfate heptahydrate            | 0.01    |     |
|            |                                      |         |     |
|            |                                      |         |     |

|            |                                                       |       |     |
|------------|-------------------------------------------------------|-------|-----|
| BFM11 [25] | soluble starch                                        | 10    |     |
|            | yeast extract                                         | 4     |     |
|            | tryptone                                              | 2     |     |
|            | potassium bromide stock solution (20 g/L)             | 5 mL  | 7.0 |
|            | iron (II) sulfate heptahydrate stock solution (8 g/L) | 5 mL  |     |
| BFM13 [26] | yeast extract                                         | 4     |     |
|            | dextrose                                              | 2     |     |
|            | sodium chloride                                       | 5     | -   |
|            | dipotassium phosphate                                 | 2.5   |     |
|            | potassium phosphate                                   | 0.5   |     |
| BFM14 [27] | ammonium sulfate                                      | 0.39  |     |
|            | disodium phosphate                                    | 5.67  |     |
|            | potassium phosphate                                   | 4.08  |     |
|            | calcium chloride dihydrate                            | 0.001 |     |
|            | magnesium sulfate heptahydrate                        | 0.197 | -   |
|            | manganese (II) sulfate heptahydrate                   | 0.002 |     |
|            | iron (II) sulfate heptahydrate                        | 0.015 |     |
|            | Pharmamedia                                           | 5     |     |

---

\* Ingredients modified from the original recipes.

**A**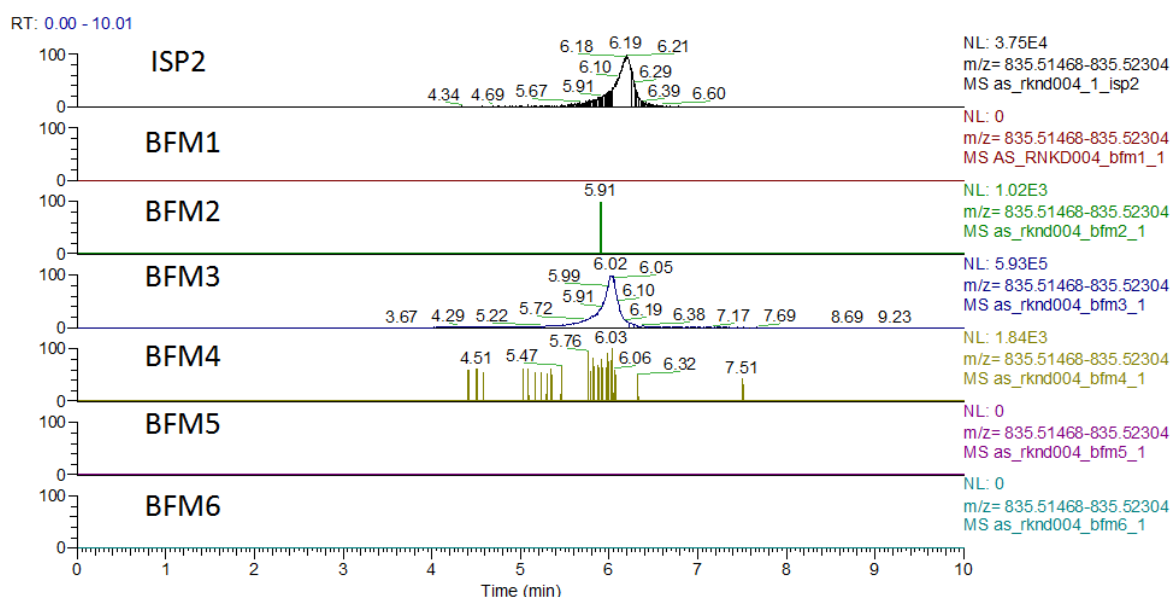**B**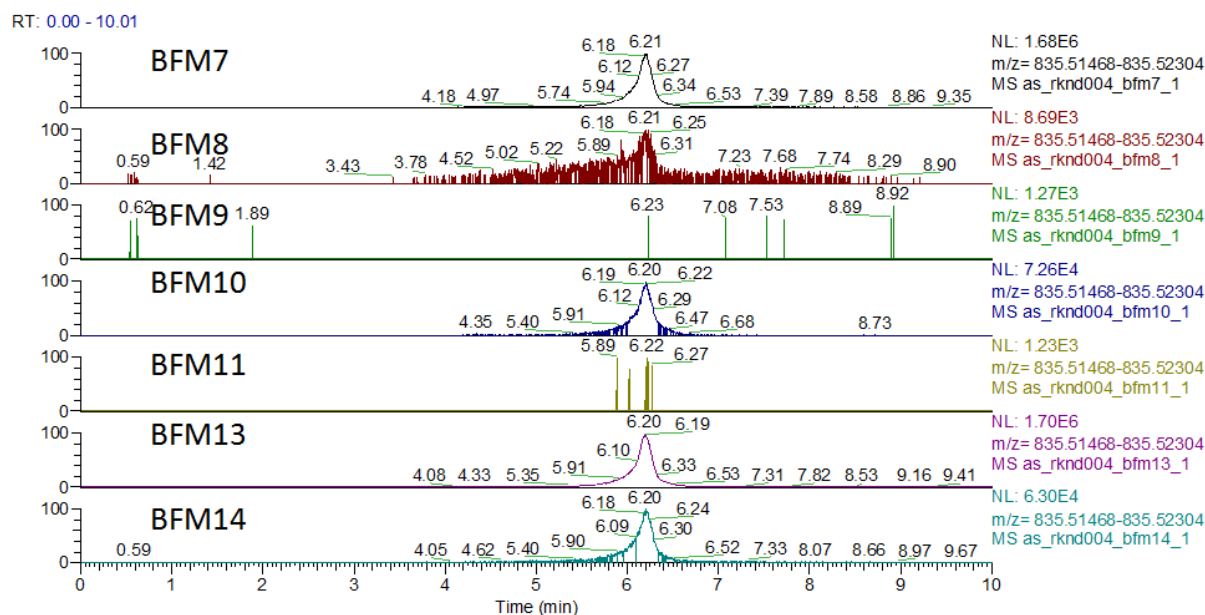

Figure S1. HPLC extracted ion chromatograms (+ESI-HRMS detector) monitoring  $m/z$  835.5186  $[M+Na]^+$  in extracts of *Streptomyces* sp. RKND004 grown in **A**. ISP2 and BFM1 – BFM6 and **B**. BFM7 – BFM14. Note the retention times of several metabolites including  $m/z$  835.5186  $[M+Na]^+$  detected in the BFM3 sample are slightly shifted compared to those in other media presumably due to matrix effects.

**A**

AS 004\_sicf2\_2 #1780 RT: 6.02 AV: 1 NL: 7.92E5  
T: FTMS (1,1) + p ESI Full ms [190.00-2000.00]

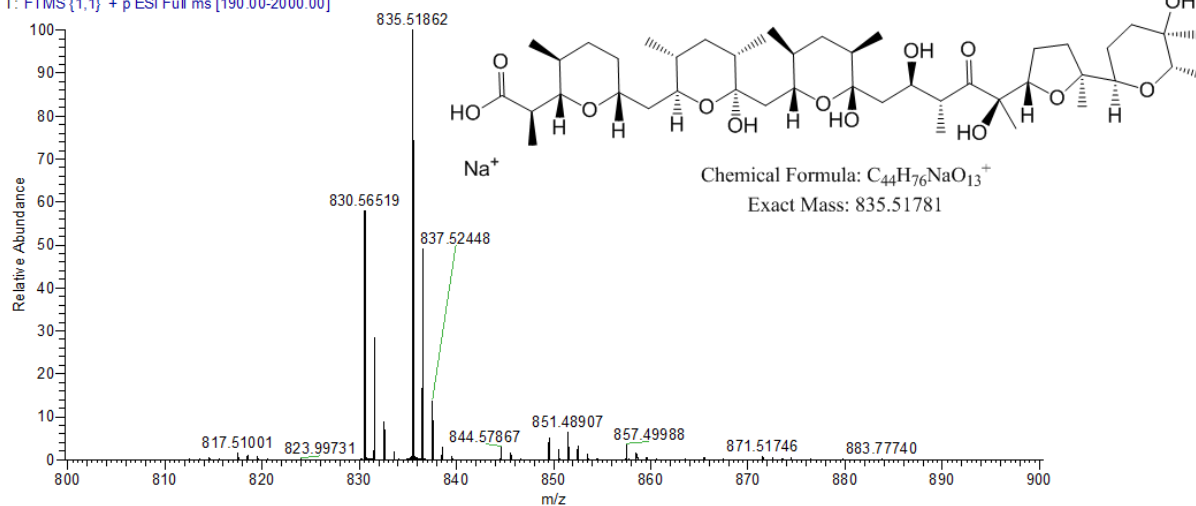**B**

AS 004LS\_cf2\_8 #1792 RT: 6.06 AV: 1 NL: 8.84E5  
T: FTMS (1,1) - p ESI Full lock ms [190.00-2000.00]

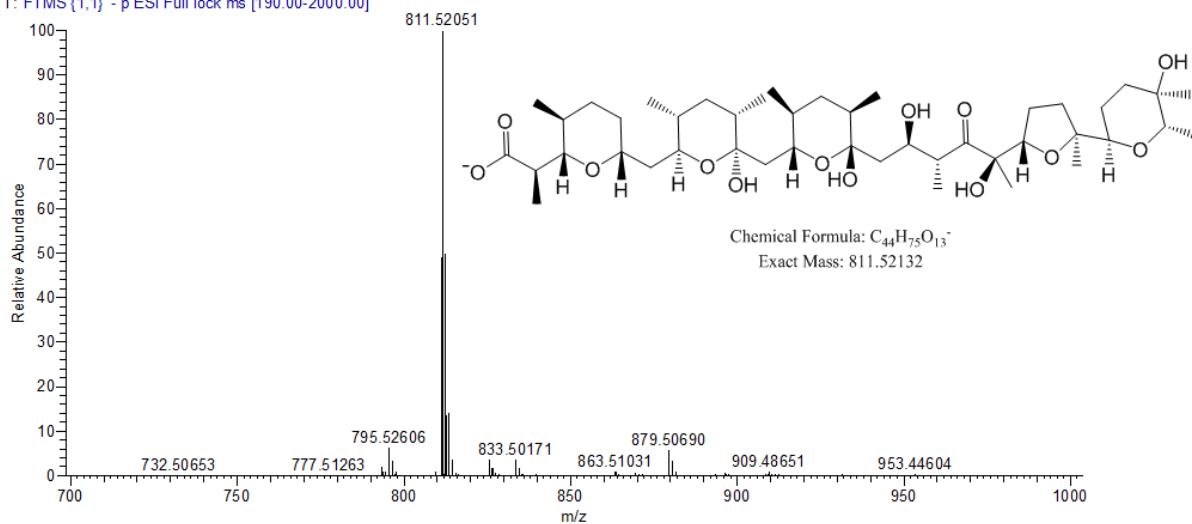

Figure S2. **A.** +ESI-HRMS spectrum of terrosamycin A (**1**). **B.** -ESI-HRMS spectrum of terrosamycin A (**1**).

**A**

AS\_004\_sicf2\_8 #1596 RT: 5.40 AV: 1 NL: 2.29E6  
T: FTMS (1,1) + p ESI Full ms [190.00-2000.00]

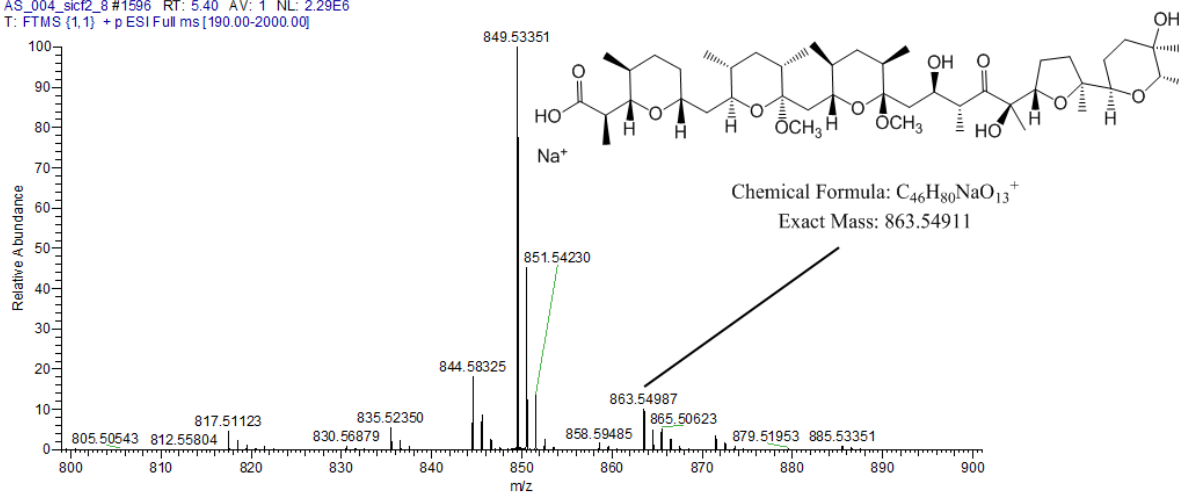**B**

AS\_004LS\_cf2\_8 #1611 RT: 5.45 AV: 1 NL: 1.48E6  
T: FTMS (1,1) - p ESI Full lock ms [190.00-2000.00]

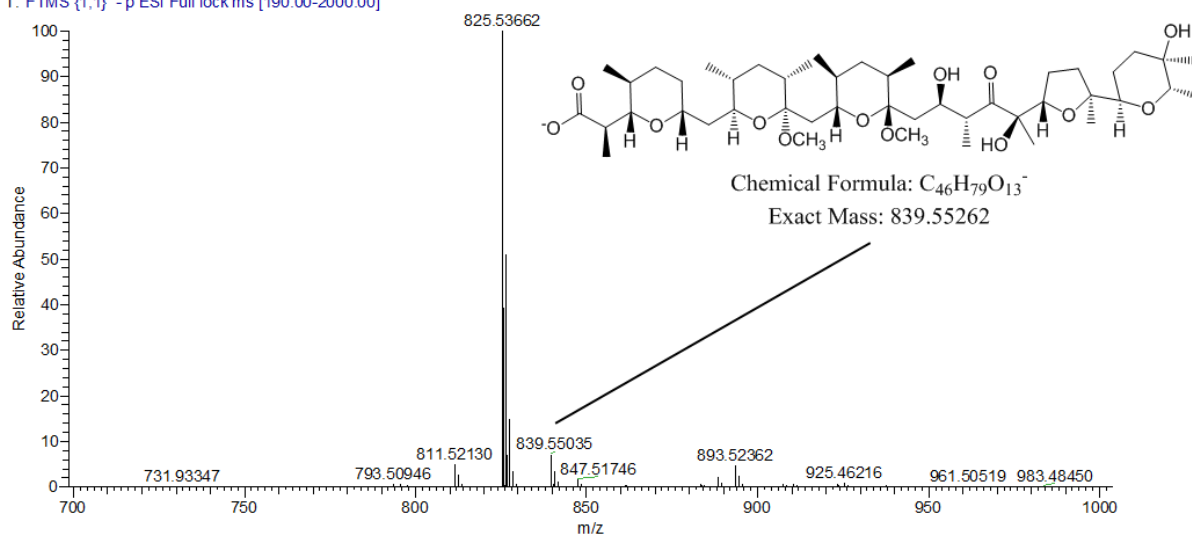

Figure S3. **A.** +ESI-HRMS spectrum of terrosamycin B (**2**). **B.** -ESI-HRMS spectrum of terrosamycin B (**2**).



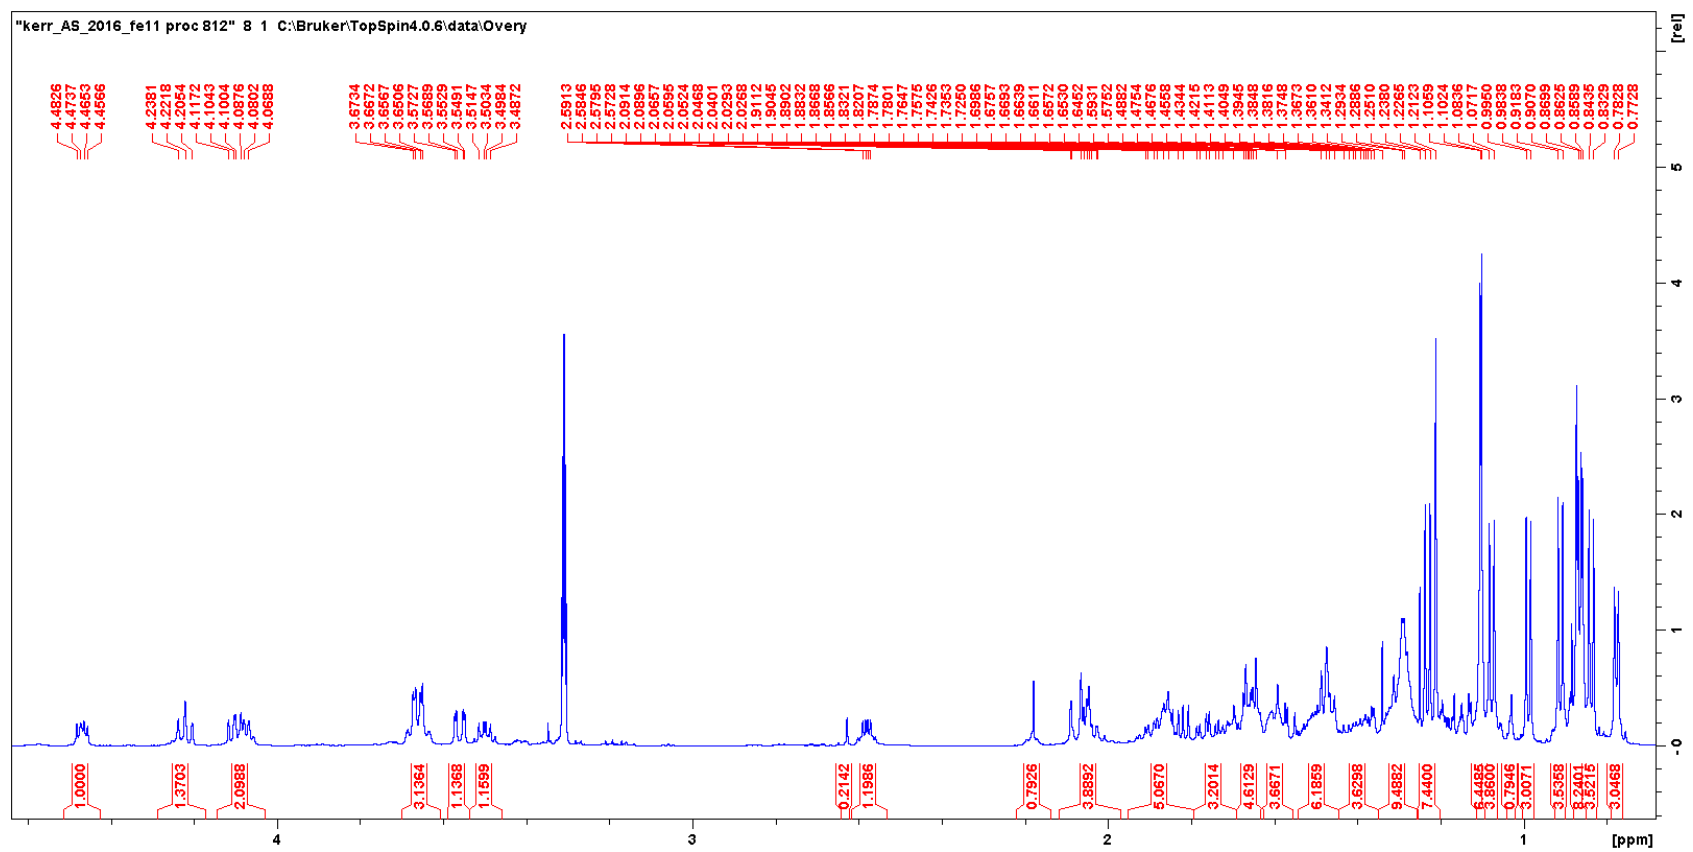

Figure S4.  $^1\text{H}$  NMR spectrum (600 MHz,  $\text{MeOD-d}_4$ ) of terrosamycin A (**1**).

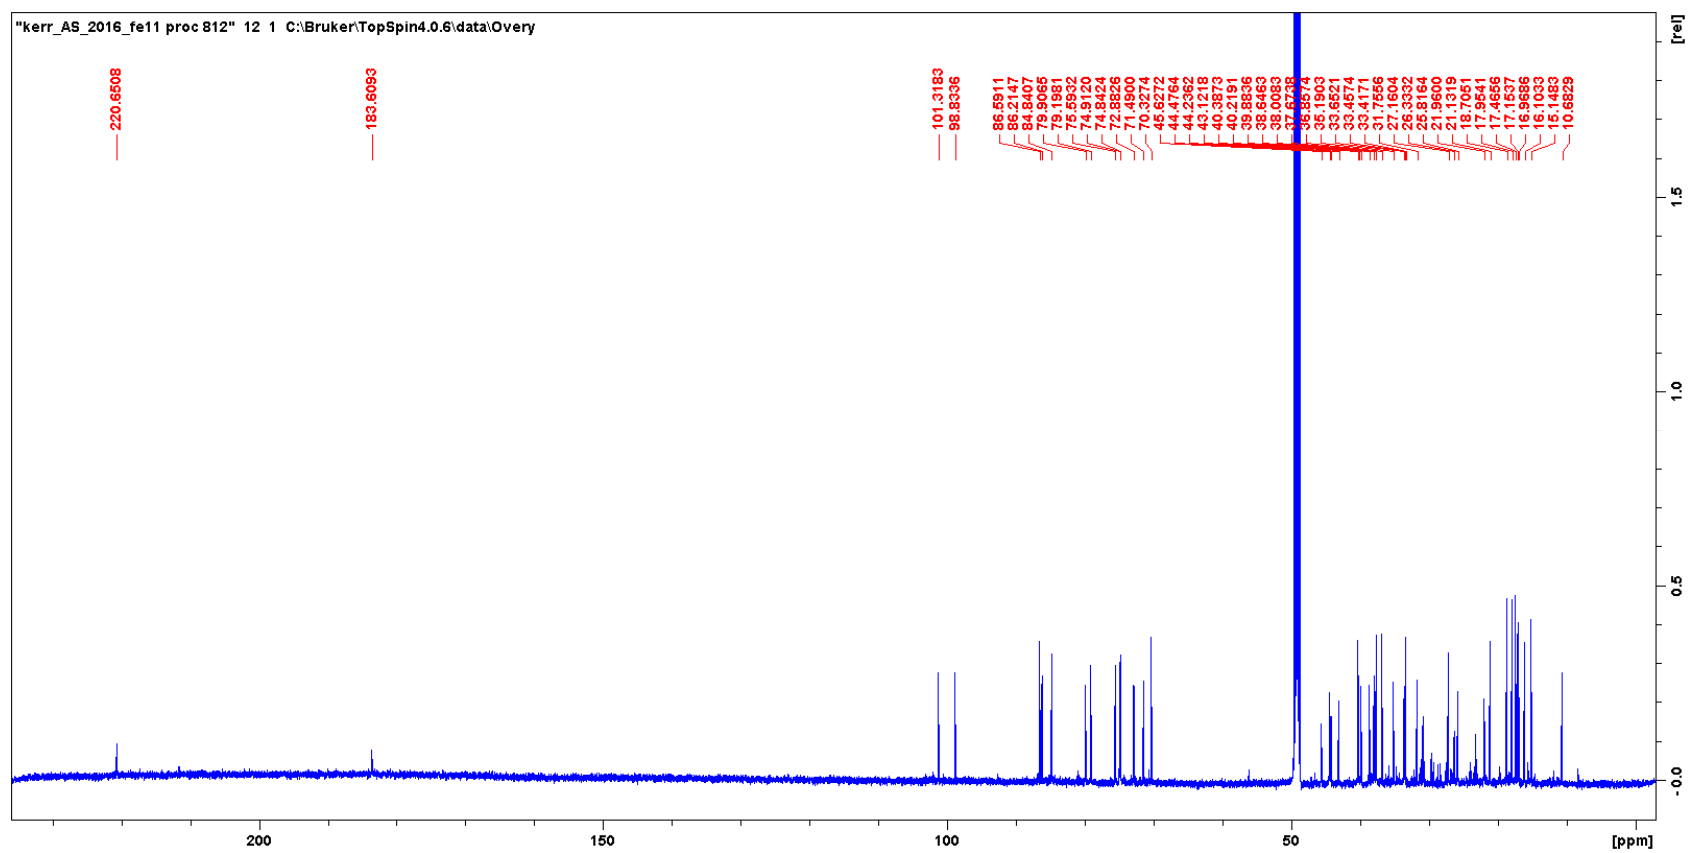

Figure S5.  $^{13}\text{C}$  NMR spectrum (150 MHz, MeOD- $d_4$ ) of terrosamycin A (**1**).

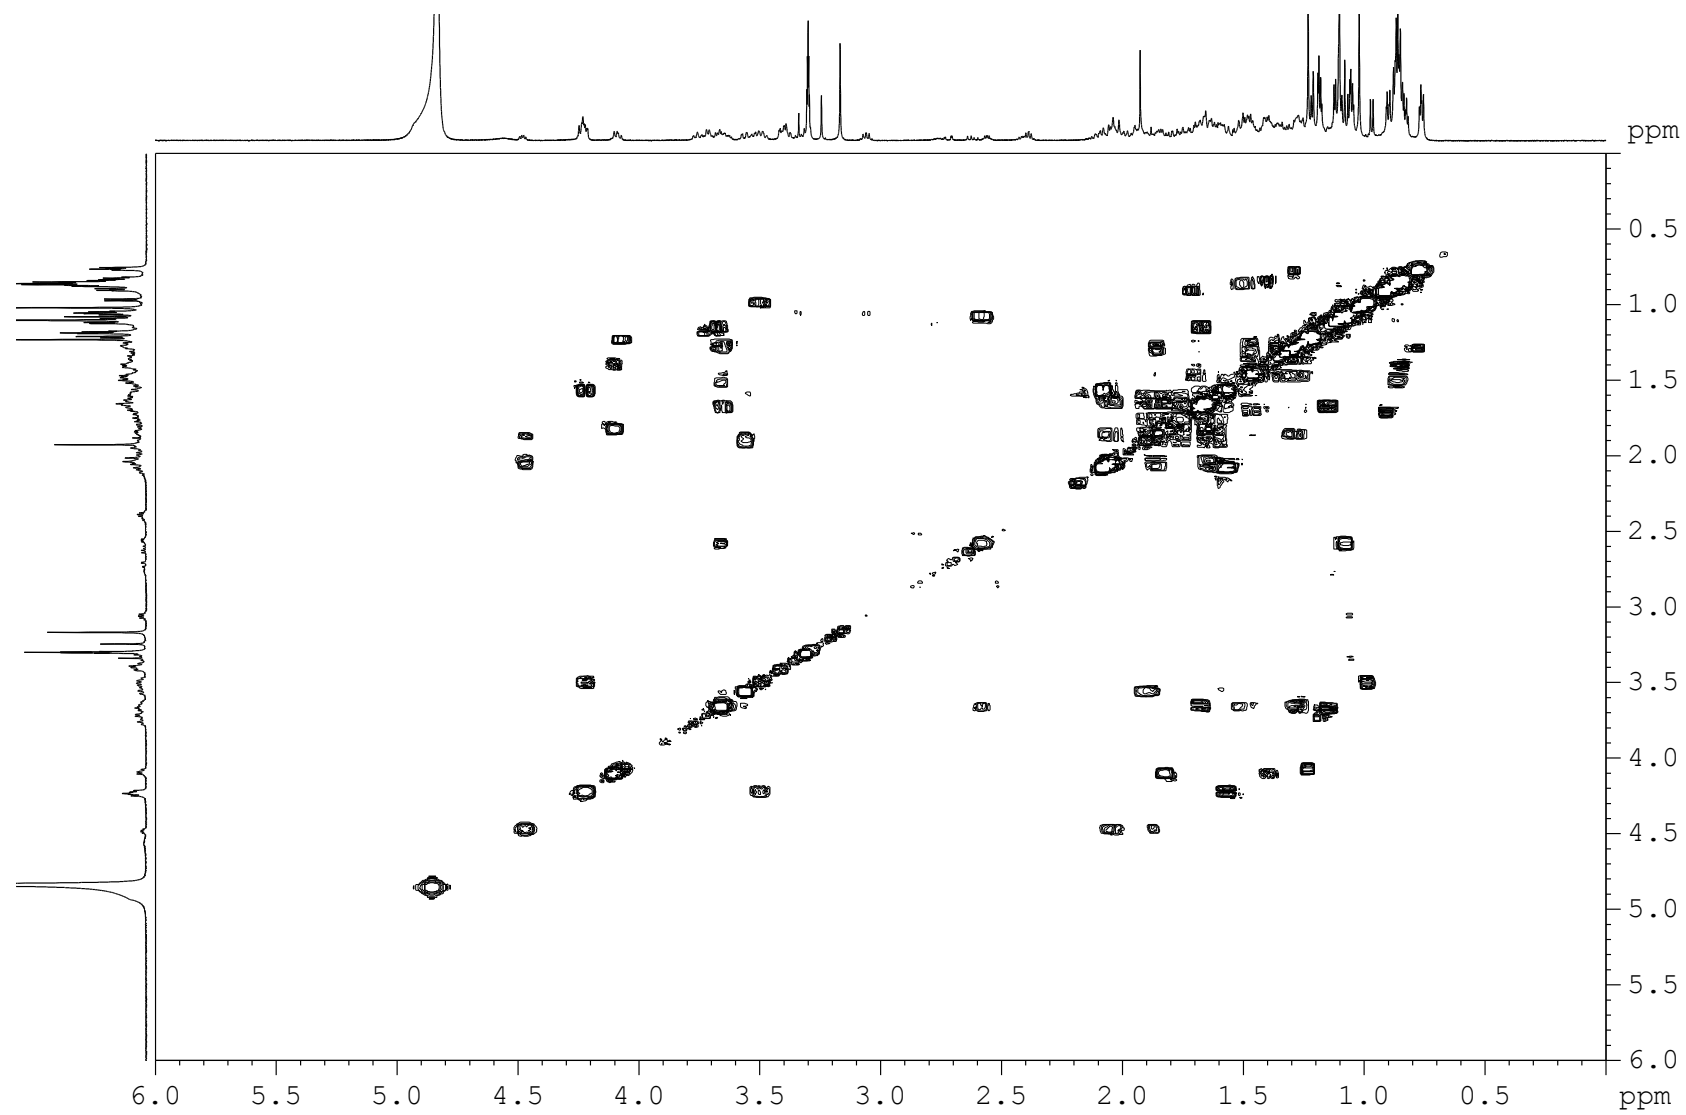

Figure S6. COSY spectrum (600 MHz, MeOD-d<sub>4</sub>) of terrosamycin A (**1**).

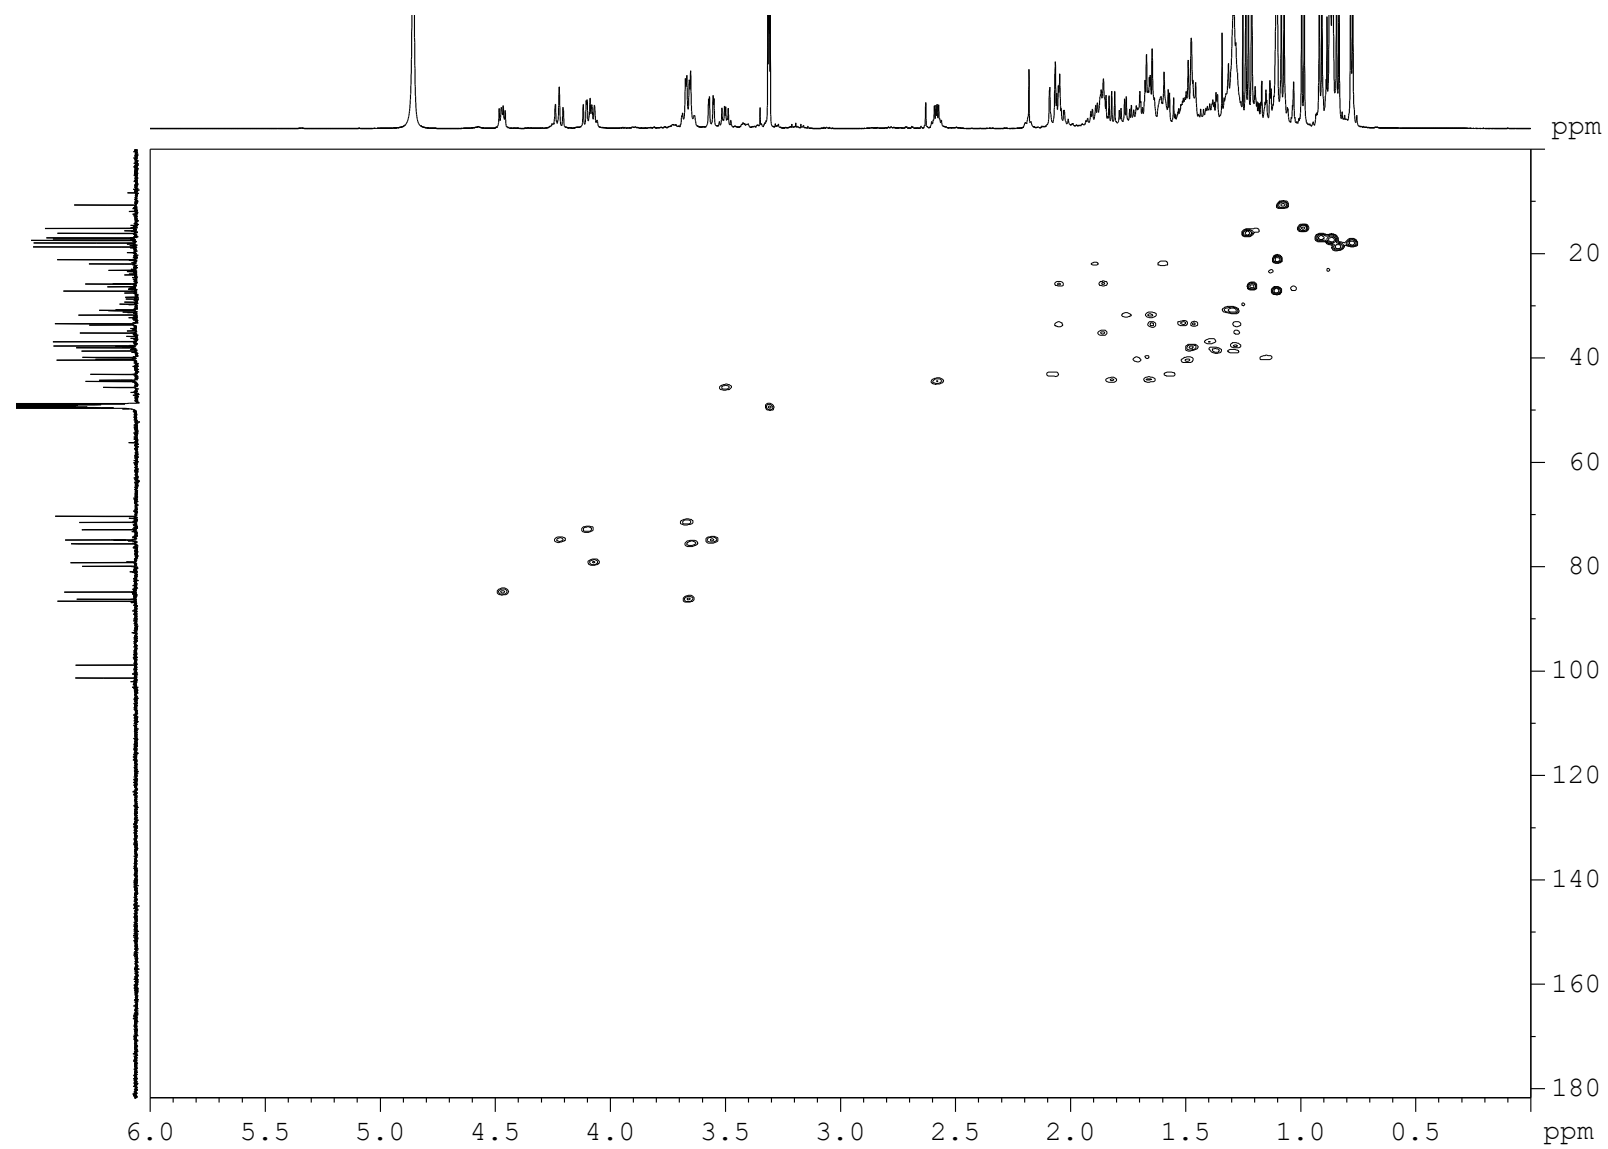

Figure S7. HSQC spectrum ( $^1\text{H}$  600 MHz,  $^{13}\text{C}$  150 MHz, MeOD- $d_4$ ) of terrosamycin A (**1**).

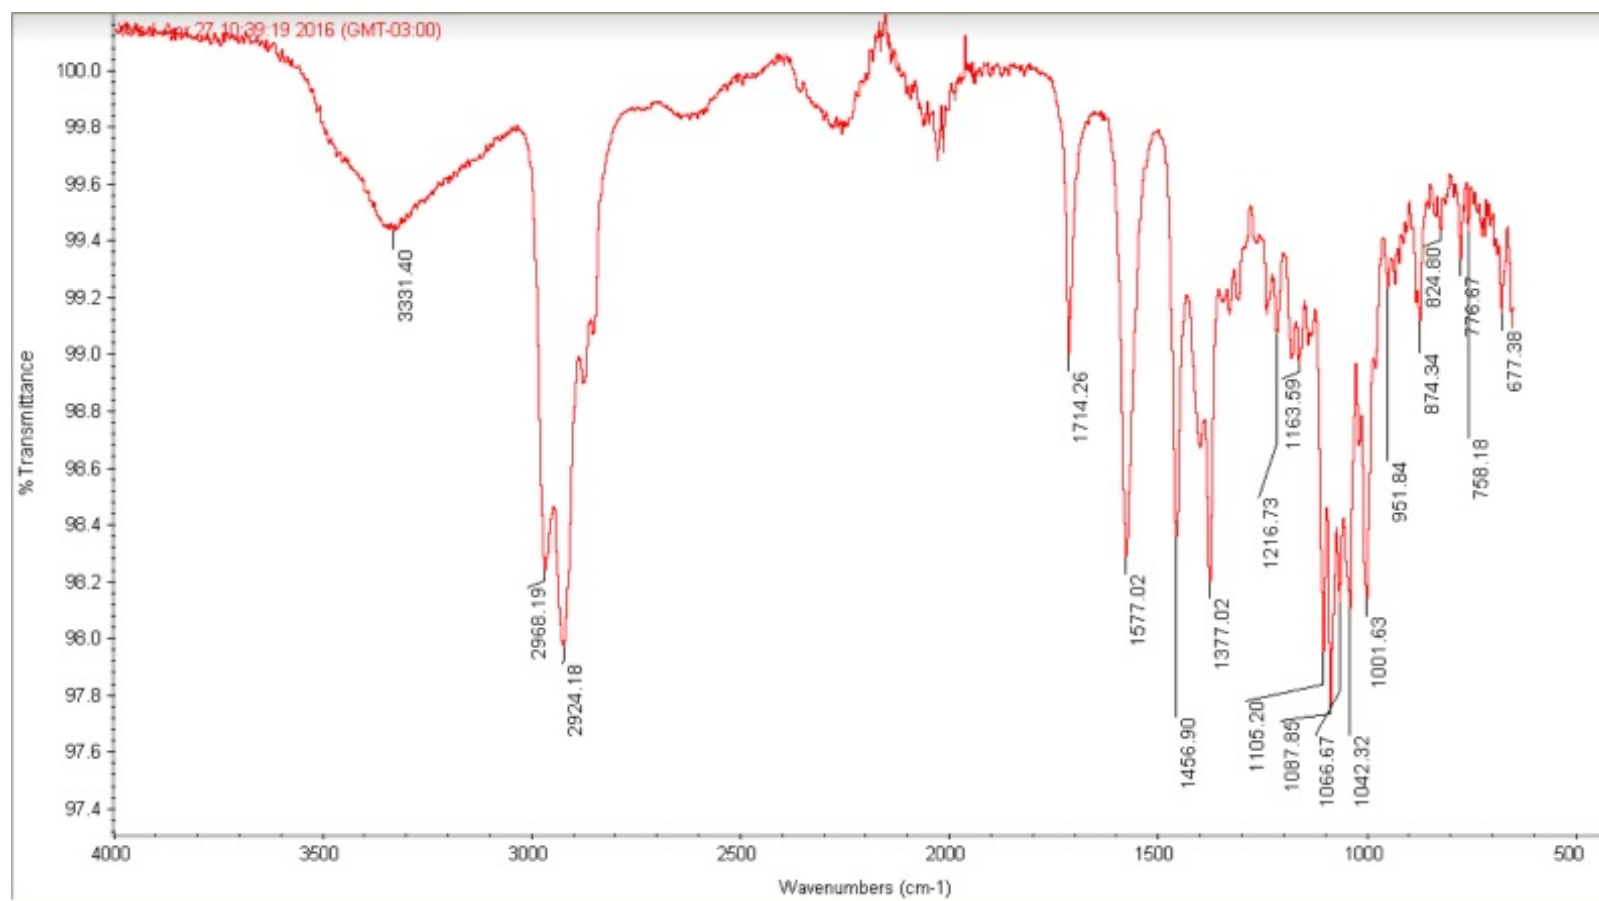

Figure S9. IR spectrum of terrosamycin A (**1**) (MeOH, film).

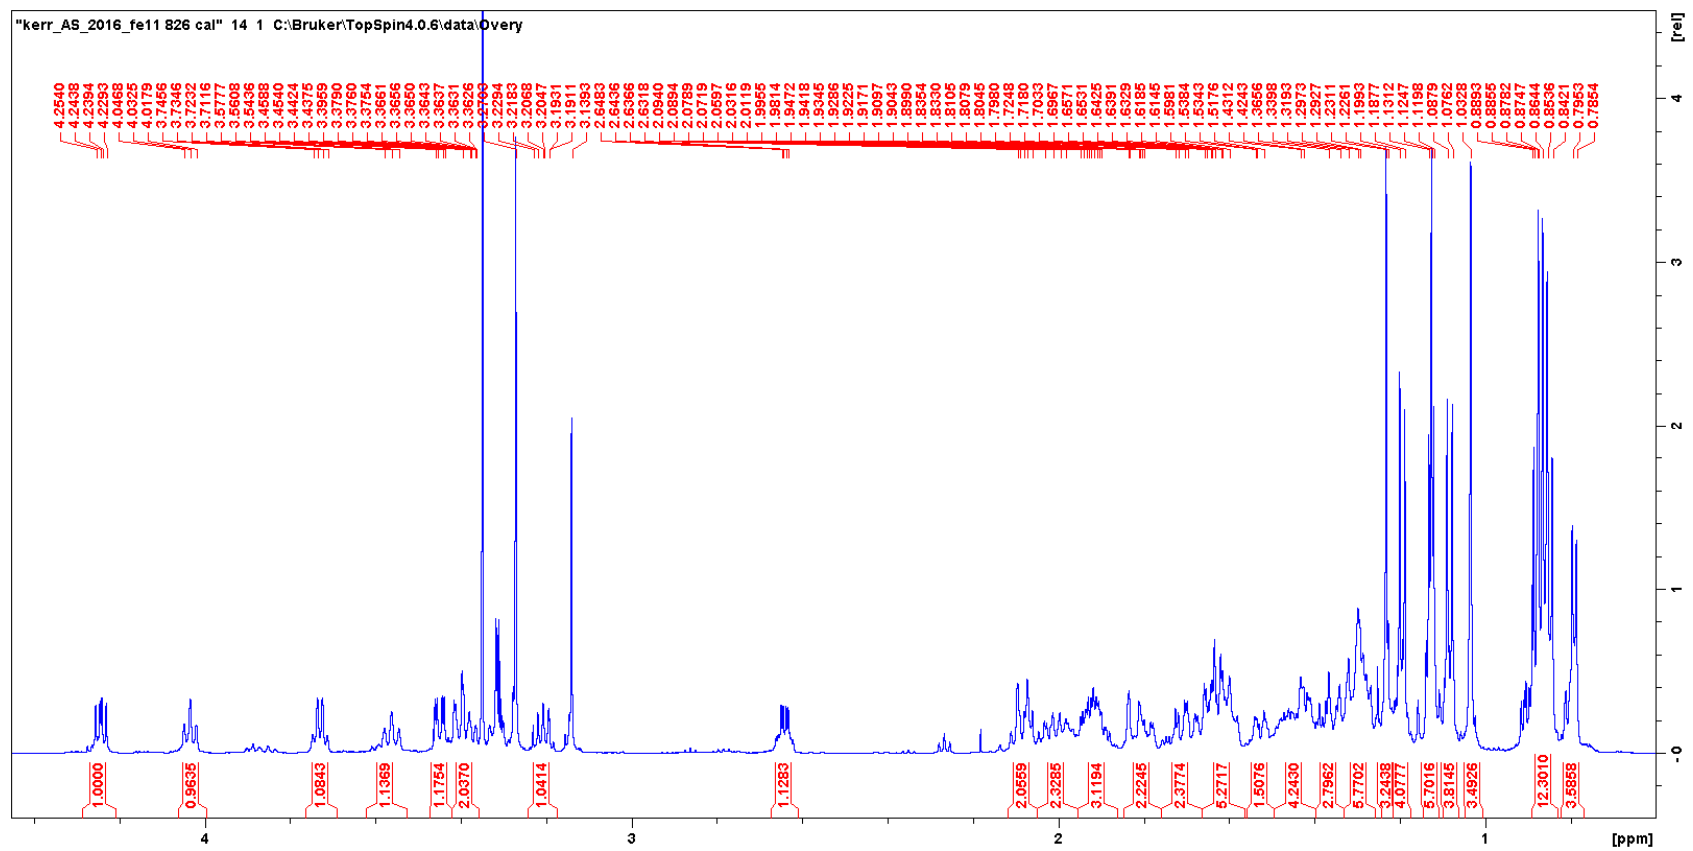

Figure S10. <sup>1</sup>H NMR spectrum (600 MHz, MeOD-d<sub>4</sub>) of terrosamycin B (**2**).

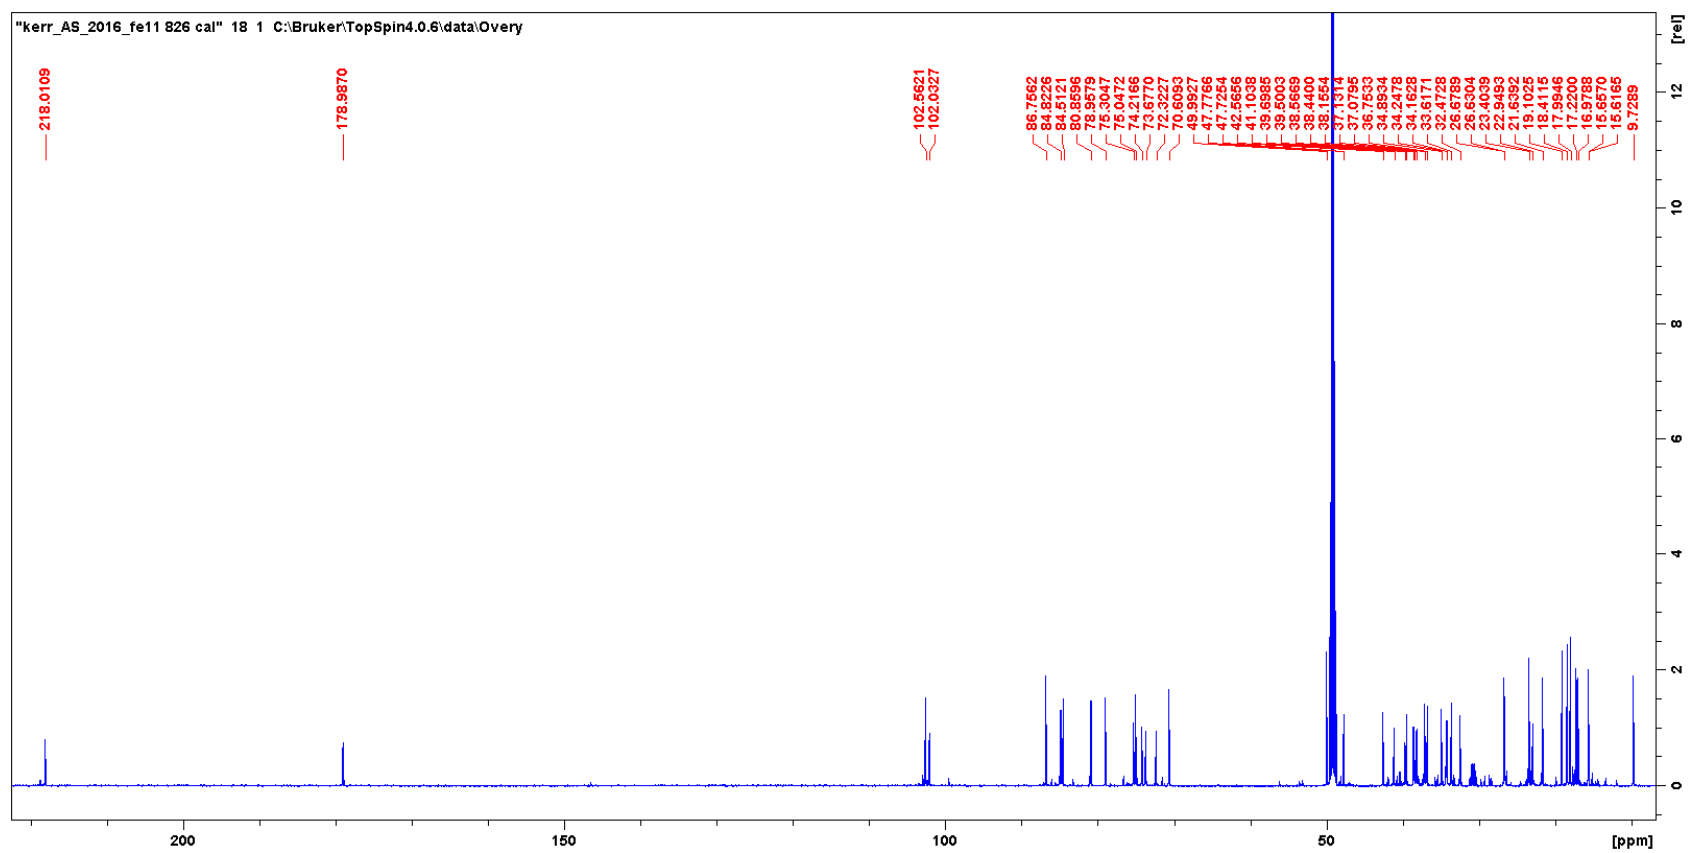

Figure S11.  $^{13}\text{C}$  NMR spectrum (150 MHz, MeOD- $d_4$ ) of terrosamycin B (**2**).

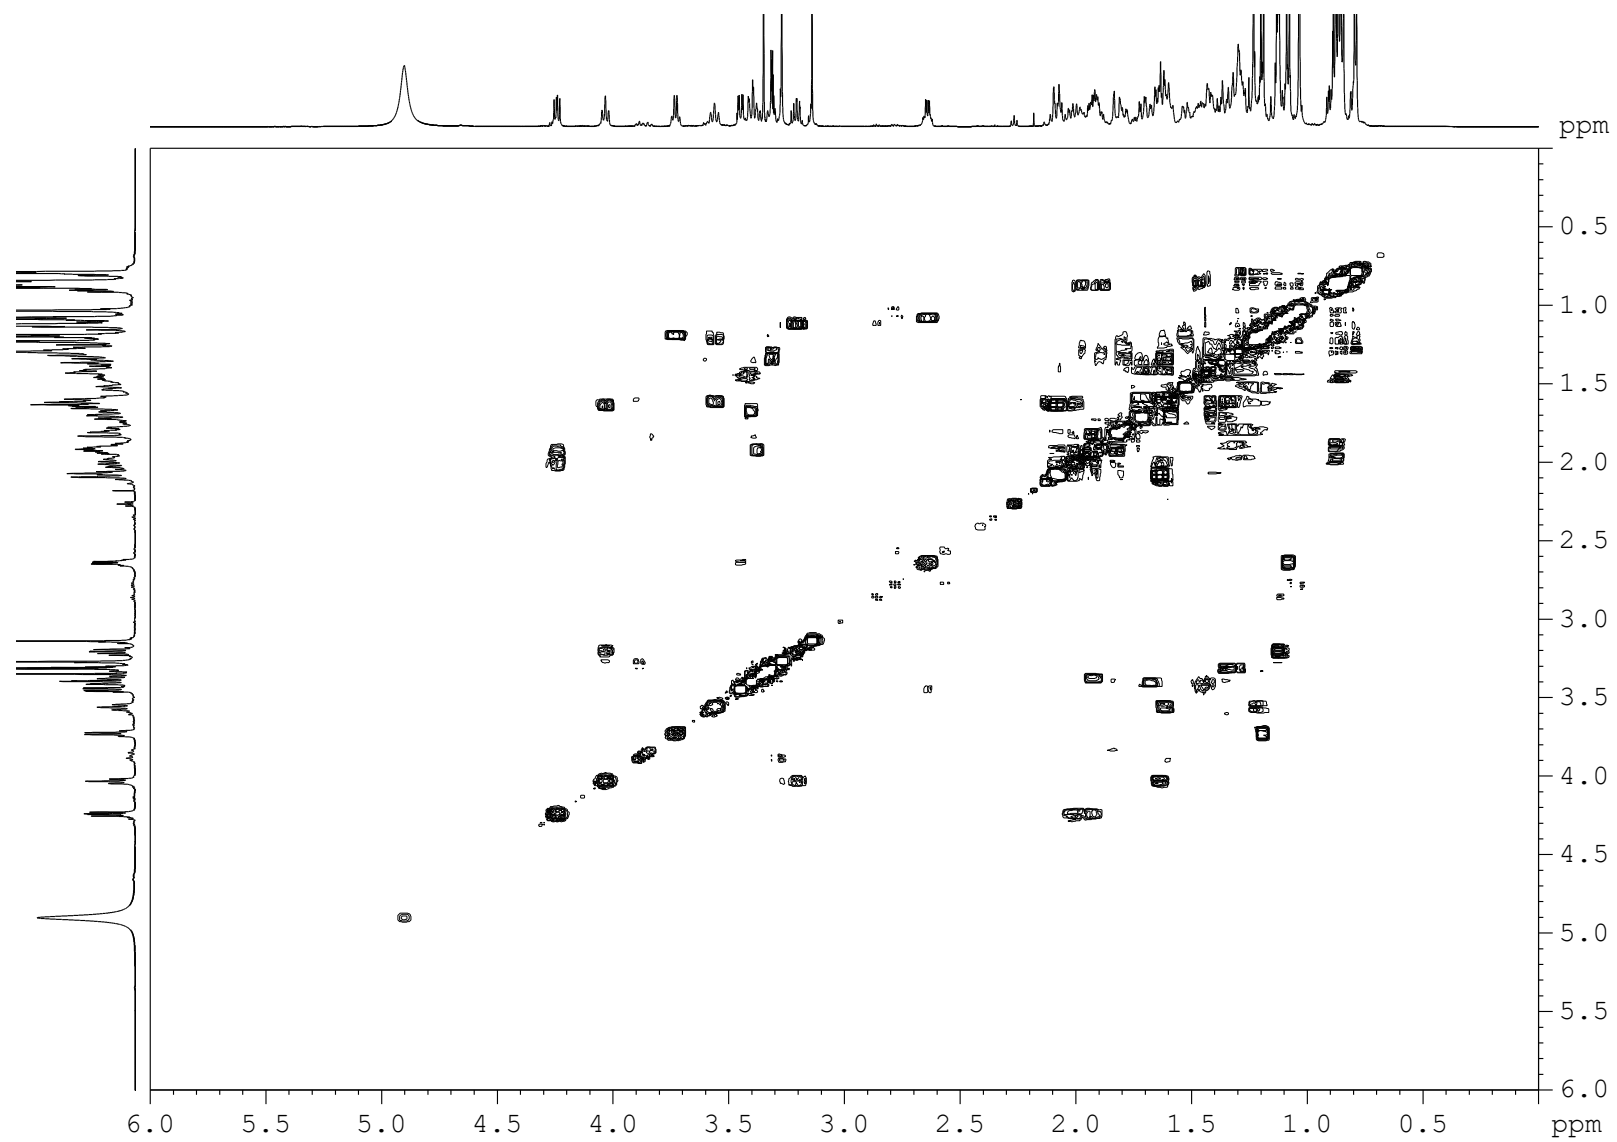

Figure S12. COSY spectrum (600 MHz, MeOD-d<sub>4</sub>) of terrosamycin B (2).



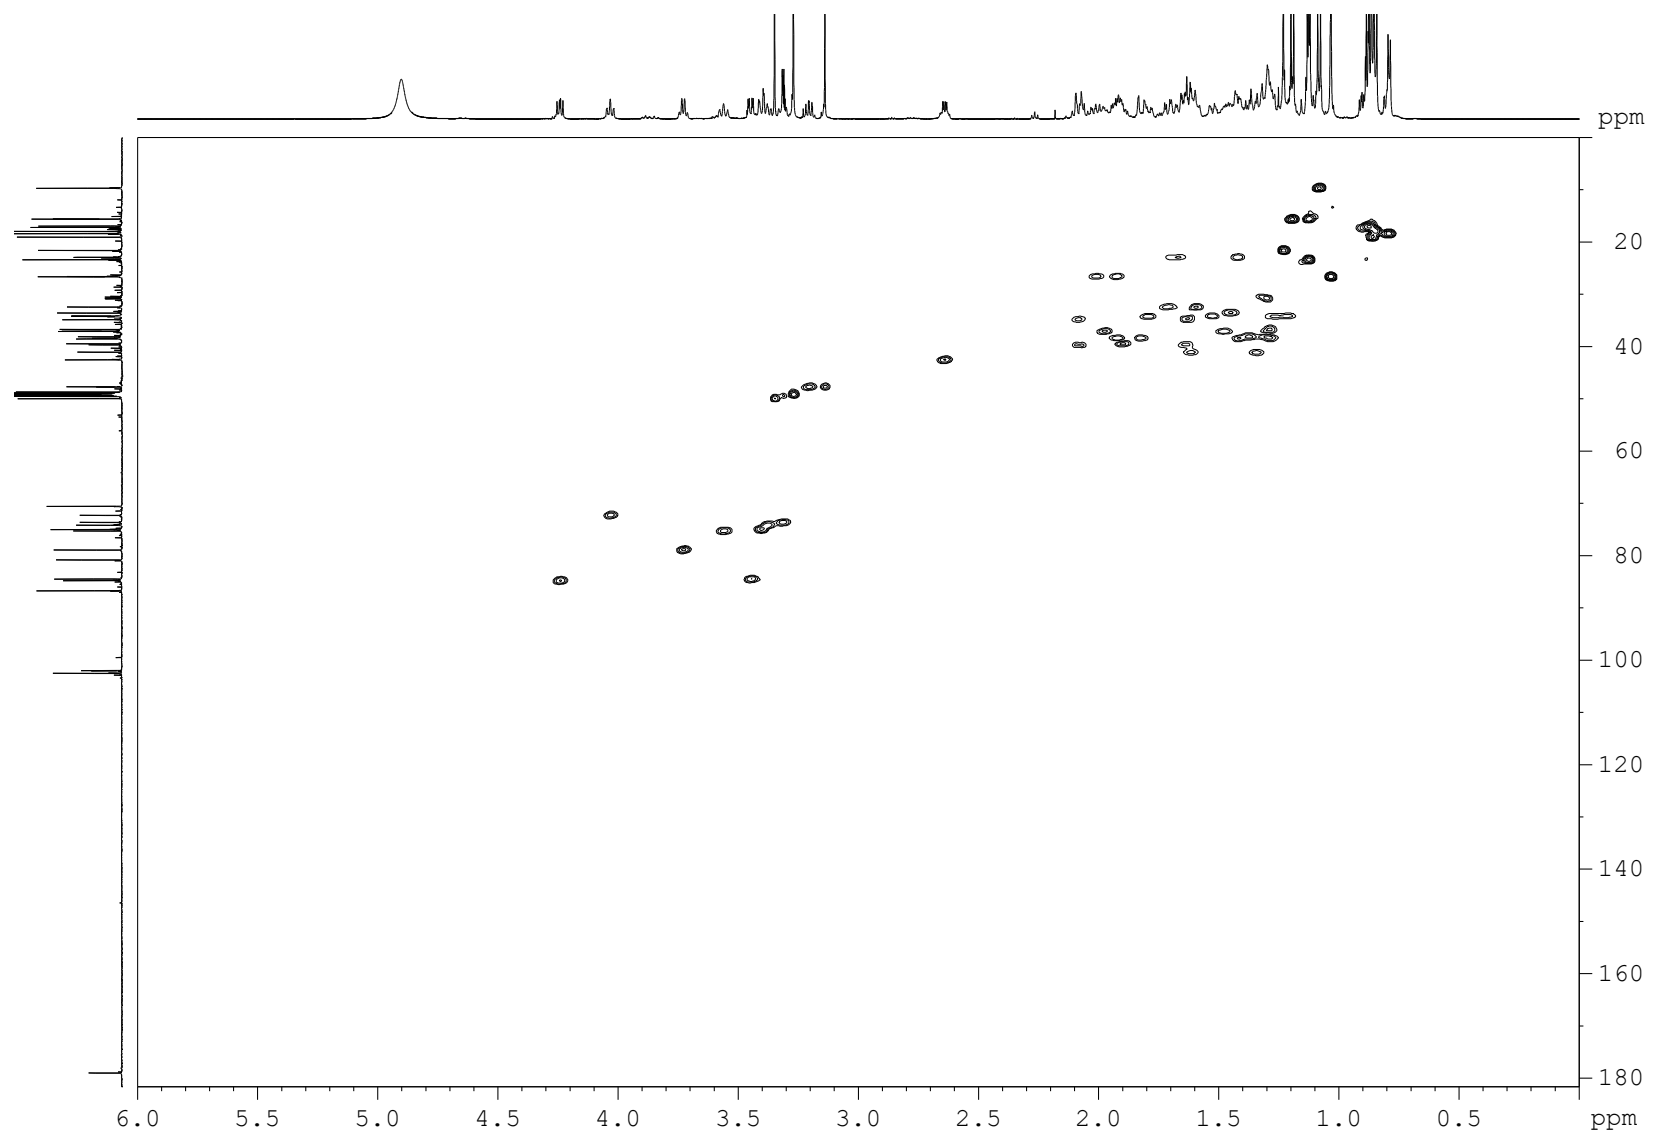

Figure S13. HSQC spectrum ( $^1\text{H}$  600 MHz,  $^{13}\text{C}$  150 MHz, MeOD- $d_4$ ) of terrosamycin B (**2**).

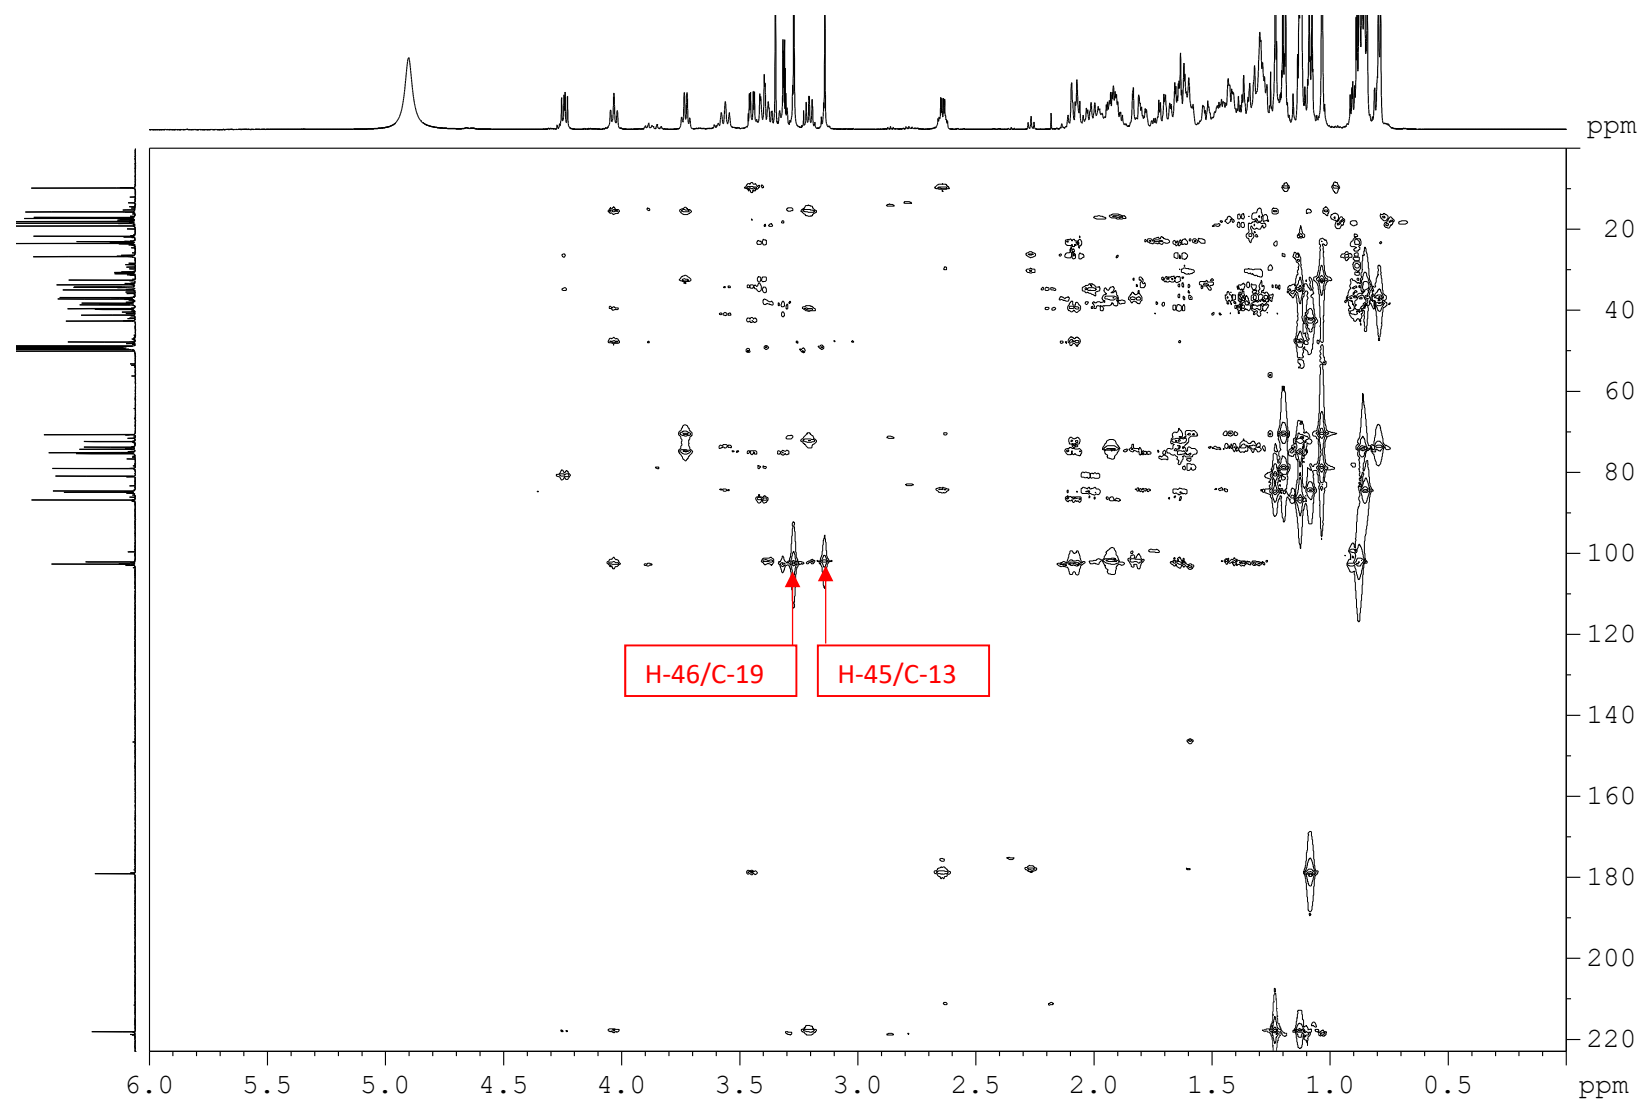

Figure S14. HMBC spectrum ( $^1\text{H}$  600 MHz,  $^{13}\text{C}$  150 MHz, MeOD- $d_4$ ) of terrosamycin B (**2**).

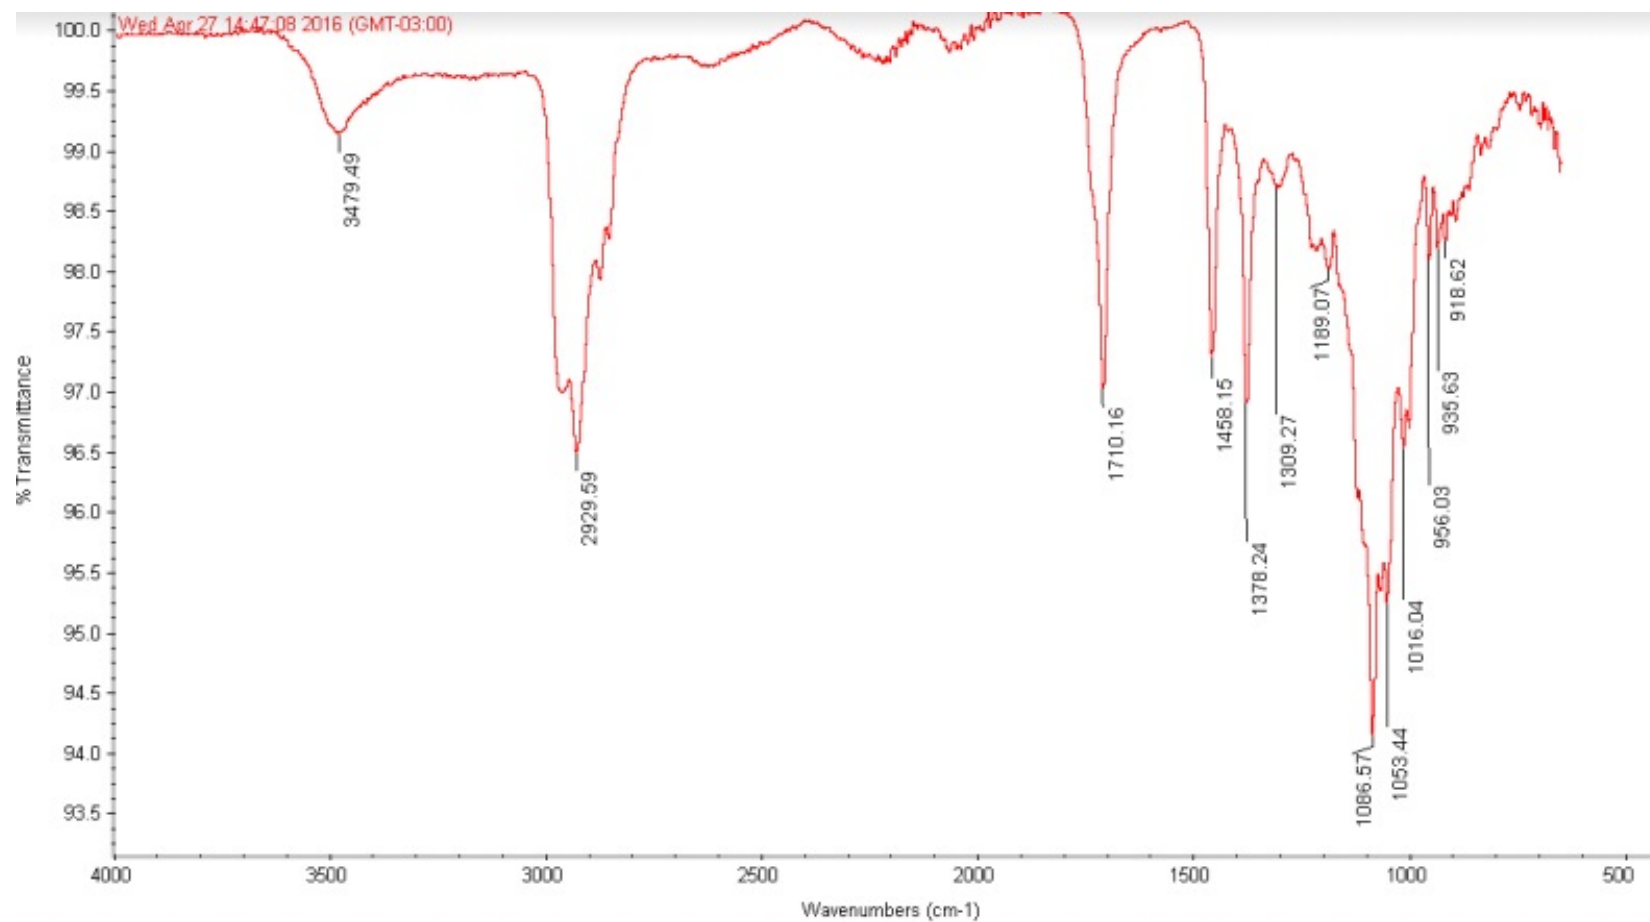

Figure S15. IR spectrum of terrosamycin B (**2**) (MeOH, film).

**A**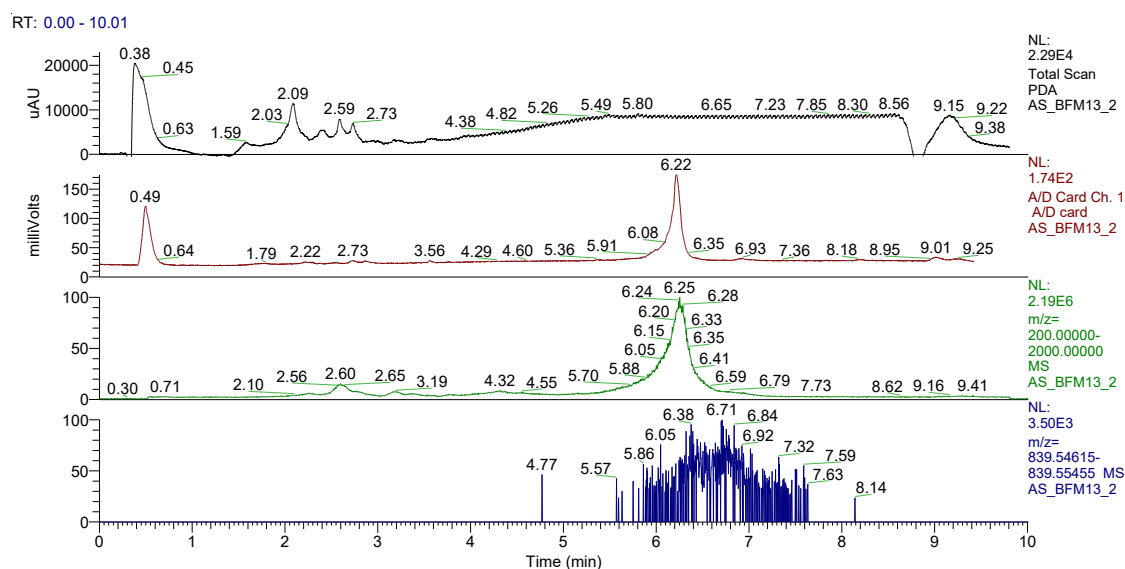**B**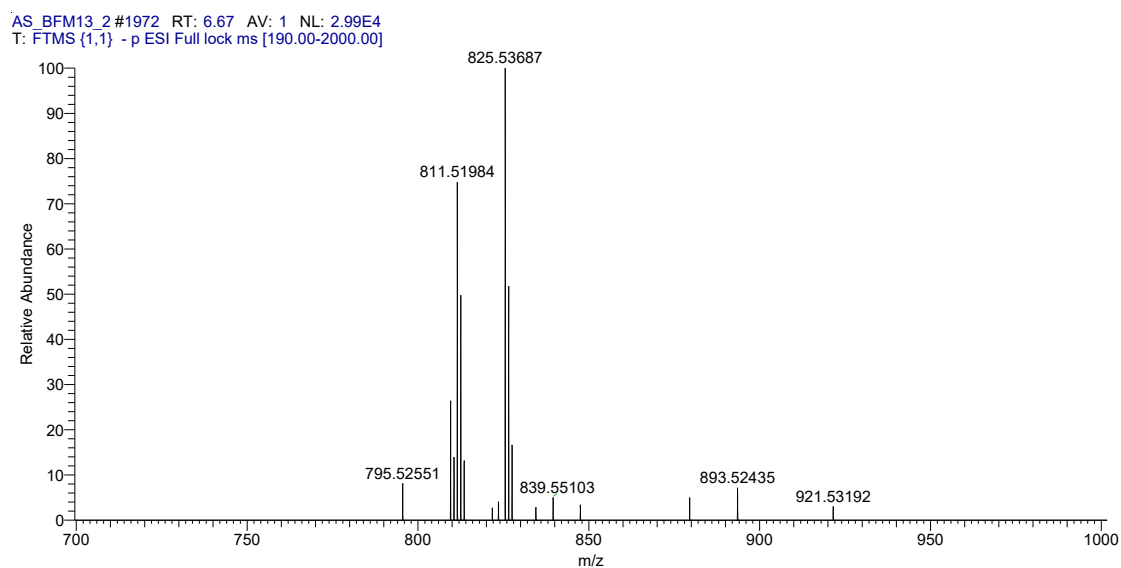

Figure S16. HPLC chromatograms of the crude acetonitrile extract of *Streptomyces* sp. RKND004 grown in BFM13. The top chromatogram was generated using a PDA detector, the second using an ELSD, and the third using  $-$ ESI-HRMS. The bottom trace is an extracted ion chromatogram monitoring  $m/z$  839.5504  $[M-H]^-$ , showing that terrosamycin B (**2**) is a true natural product and not only the result of methylation during sample preparation. **B.**  $-$ ESI-HRMS spectrum of the eluent at 6.7 min.

Table S2. Crystal data and structure refinement for terrosamycin A (**1**).

|                                 |                                                                                              |                 |
|---------------------------------|----------------------------------------------------------------------------------------------|-----------------|
| Identification code             | RK160391                                                                                     |                 |
| Empirical formula               | C <sub>45.50</sub> H <sub>79</sub> K O <sub>14</sub>                                         |                 |
| Moiety formula                  | C <sub>44</sub> H <sub>75</sub> KO <sub>13</sub> • ½ Me <sub>2</sub> CO • ½ H <sub>2</sub> O |                 |
| Formula weight                  | 889.19                                                                                       |                 |
| Temperature                     | 173(1) K                                                                                     |                 |
| Wavelength                      | 0.71073 Å                                                                                    |                 |
| Diffractometer used             | Bruker AXS P4/SMART 1000                                                                     |                 |
| Detector distance               | 5 cm                                                                                         |                 |
| Monochromator used              | Graphite                                                                                     |                 |
| Crystal size                    | 0.50 x 0.30 x 0.30 mm <sup>3</sup>                                                           |                 |
| Colour and habit                | Colourless, block                                                                            |                 |
| Crystal system                  | Monoclinic                                                                                   |                 |
| Space group                     | P2(1)                                                                                        |                 |
| Unit cell dimensions            | a = 12.004(3) Å                                                                              | α = 90°         |
|                                 | b = 35.796(10) Å                                                                             | β = 103.826(4)° |
|                                 | c = 12.020(3) Å                                                                              | γ = 90°         |
| Volume                          | 5015(2) Å <sup>3</sup>                                                                       |                 |
| Z                               | 4                                                                                            |                 |
| Density (calculated)            | 1.178 Mg/m <sup>3</sup>                                                                      |                 |
| Absorption coefficient          | 0.166 mm <sup>-1</sup>                                                                       |                 |
| F(000)                          | 1932                                                                                         |                 |
| Theta range for data collection | 1.74 to 27.50°                                                                               |                 |
| Completeness to theta = 25.00°  | 99.8 %                                                                                       |                 |
| Scan type                       | ω and φ                                                                                      |                 |
| Scan range                      | 0.3°                                                                                         |                 |

|                                   |                                                   |
|-----------------------------------|---------------------------------------------------|
| Exposure time                     | 10s                                               |
| Index ranges                      | -15 ≤ h ≤ 14, -46 ≤ k ≤ 46, -15 ≤ l ≤ 13          |
| Standard reflections              | 50 frames at beginning and end of data collection |
| Crystal stability                 | no decay                                          |
| Reflections collected             | 34091                                             |
| Independent reflections           | 21746 [R(int) = 0.0760]                           |
| Solution                          | Direct methods                                    |
| Hydrogen atoms                    | Mixed                                             |
| Absorption correction             | SADABS                                            |
| Max. and min. transmission        | 0.9520 and 0.9217                                 |
| Refinement method                 | Full-matrix least-squares on F <sup>2</sup>       |
| Data / restraints / parameters    | 21746 / 25 / 1158                                 |
| Goodness-of-fit on F <sup>2</sup> | 1.019                                             |
| Final R indices [I > 2σ(I)]       | R1 = 0.0781, wR2 = 0.1906                         |
| R indices (all data)              | R1 = 0.1075, wR2 = 0.2045                         |
| Largest/mean shift/esd            | 0.001/0.000                                       |
| Absolute structure parameter      | 0.05(4)                                           |
| Largest diff. peak and hole       | 0.938 and -0.343 e.Å <sup>-3</sup>                |

$$wR2 = (\sum[w(F_o^2 - F_c^2)^2] / \sum[wF_o^4])^{1/2}$$

$$R1 = \sum ||F_o| - |F_c|| / \sum |F_o|$$

$$\text{Weight} = 1 / [\sigma^2(F_o^2) + (0.0949 * P)^2]$$

$$\text{where } P = (\max(F_o^2, 0) + 2 * F_c^2) / 3$$

Table S3. Atomic coordinates ( $\times 10^4$ ) and equivalent isotropic displacement parameters ( $\text{\AA}^2 \times 10^3$ ) for terrosamycin A (**1**).  $U(\text{eq})$  is defined as one third of the trace of the orthogonalized  $U^{ij}$  tensor.

|       | x        | y       | z        | $U(\text{eq})$ |
|-------|----------|---------|----------|----------------|
| K(1)  | 7586(1)  | 7727(1) | 8471(1)  | 36(1)          |
| O(1)  | 9123(3)  | 7802(1) | 10852(2) | 35(1)          |
| O(2)  | 8557(3)  | 8315(1) | 9880(2)  | 44(1)          |
| O(3)  | 11387(3) | 8282(1) | 11225(2) | 36(1)          |
| O(4)  | 11787(3) | 7528(1) | 9794(2)  | 35(1)          |
| O(5)  | 9813(3)  | 7469(1) | 9143(2)  | 36(1)          |
| O(6)  | 9765(3)  | 6922(1) | 11086(2) | 32(1)          |
| O(7)  | 9702(3)  | 7326(1) | 12596(2) | 36(1)          |
| O(8)  | 7679(3)  | 7034(1) | 9796(2)  | 40(1)          |
| O(9)  | 5530(3)  | 7572(1) | 9446(3)  | 53(1)          |
| O(10) | 5723(3)  | 6657(1) | 8587(3)  | 52(1)          |
| O(11) | 5795(3)  | 7277(1) | 7182(2)  | 45(1)          |
| O(12) | 7355(3)  | 7592(1) | 5999(2)  | 42(1)          |
| O(13) | 7543(4)  | 8291(1) | 6989(2)  | 51(1)          |
| C(1)  | 9070(4)  | 8156(1) | 10759(3) | 33(1)          |
| C(2)  | 9672(4)  | 8383(1) | 11825(3) | 38(1)          |
| C(3)  | 10902(5) | 8253(1) | 12199(3) | 41(1)          |
| C(4)  | 11683(5) | 8456(2) | 13216(4) | 55(2)          |
| C(5)  | 12892(6) | 8305(2) | 13430(5) | 67(2)          |
| C(6)  | 13336(5) | 8307(2) | 12338(5) | 61(2)          |
| C(7)  | 12474(4) | 8110(2) | 11381(4) | 44(1)          |
| C(8)  | 12781(4) | 8095(2) | 10234(4) | 48(1)          |
| C(9)  | 11877(4) | 7897(1) | 9348(3)  | 36(1)          |

|       |          |         |          |       |
|-------|----------|---------|----------|-------|
| C(10) | 12121(6) | 7854(2) | 8160(4)  | 55(1) |
| C(11) | 11169(5) | 7628(2) | 7425(4)  | 57(2) |
| C(12) | 10955(5) | 7247(2) | 7931(3)  | 48(1) |
| C(13) | 10870(4) | 7305(1) | 9194(3)  | 33(1) |
| C(14) | 11041(4) | 6936(1) | 9864(3)  | 32(1) |
| C(15) | 10942(4) | 6972(1) | 11119(3) | 32(1) |
| C(16) | 11693(4) | 6699(2) | 11932(4) | 44(1) |
| C(17) | 11377(5) | 6736(1) | 13105(3) | 45(1) |
| C(18) | 10116(5) | 6690(1) | 13028(3) | 41(1) |
| C(19) | 9420(4)  | 6967(1) | 12159(3) | 35(1) |
| C(20) | 8153(4)  | 6886(1) | 11848(3) | 40(1) |
| C(21) | 7434(4)  | 7126(1) | 10891(3) | 35(1) |
| C(22) | 6147(4)  | 7070(2) | 10737(4) | 44(1) |
| C(23) | 5564(4)  | 7237(1) | 9584(4)  | 40(1) |
| C(24) | 5011(4)  | 6970(2) | 8617(4)  | 45(1) |
| C(25) | 4746(4)  | 7170(2) | 7465(4)  | 46(1) |
| C(26) | 4088(5)  | 6942(2) | 6446(5)  | 66(2) |
| C(27) | 4477(5)  | 7115(2) | 5463(5)  | 69(2) |
| C(28) | 5735(5)  | 7210(2) | 5972(4)  | 48(1) |
| C(29) | 6166(4)  | 7560(1) | 5484(3)  | 41(1) |
| C(30) | 5554(4)  | 7922(2) | 5628(4)  | 50(1) |
| C(31) | 6115(5)  | 8255(2) | 5221(4)  | 54(1) |
| C(32) | 7411(5)  | 8265(1) | 5759(3)  | 45(1) |
| C(33) | 7935(5)  | 7897(1) | 5557(4)  | 44(1) |
| C(34) | 8033(7)  | 7815(2) | 4343(5)  | 69(2) |
| C(35) | 7995(6)  | 8599(2) | 5370(4)  | 58(2) |
| C(36) | 6512(6)  | 6880(2) | 5910(5)  | 63(2) |



|        |          |         |          |       |
|--------|----------|---------|----------|-------|
| C(37)  | 3917(5)  | 6830(2) | 8914(5)  | 57(1) |
| C(38)  | 5707(5)  | 7263(2) | 11698(5) | 64(2) |
| C(39)  | 9865(6)  | 6733(2) | 14221(4) | 56(2) |
| C(40)  | 12956(5) | 6761(2) | 12066(4) | 62(2) |
| C(41)  | 9931(6)  | 7051(2) | 7211(4)  | 61(2) |
| C(42)  | 12268(8) | 8236(2) | 7616(5)  | 85(2) |
| C(43)  | 11205(7) | 8416(2) | 14298(4) | 80(2) |
| C(44)  | 9542(5)  | 8801(1) | 11637(4) | 47(1) |
| K(2)   | 1494(1)  | 5005(1) | 598(1)   | 40(1) |
| O(101) | 2901(3)  | 4399(1) | 1518(3)  | 49(1) |
| O(102) | 3856(3)  | 4911(1) | 2142(2)  | 36(1) |
| O(103) | 4299(3)  | 4409(1) | 4377(2)  | 37(1) |
| O(104) | 2872(3)  | 5146(1) | 4862(2)  | 32(1) |
| O(105) | 2123(3)  | 5198(1) | 2893(2)  | 33(1) |
| O(106) | 4107(3)  | 5786(1) | 2816(2)  | 30(1) |
| O(107) | 5594(3)  | 5378(1) | 2701(3)  | 38(1) |
| O(108) | 2827(3)  | 5704(1) | 738(2)   | 42(1) |
| O(109) | 2418(4)  | 5176(1) | -1443(3) | 68(1) |
| O(110) | 1715(4)  | 6108(1) | -1166(3) | 50(1) |
| O(111) | 231(3)   | 5502(1) | -1078(3) | 53(1) |
| O(112) | -938(3)  | 5152(1) | 440(3)   | 44(1) |
| O(113) | -35(3)   | 4446(1) | 421(3)   | 49(1) |
| C(101) | 3781(4)  | 4560(1) | 2047(3)  | 35(1) |
| C(102) | 4850(4)  | 4334(1) | 2627(4)  | 38(1) |
| C(103) | 5262(4)  | 4458(1) | 3879(4)  | 41(1) |
| C(104) | 6311(4)  | 4260(2) | 4582(5)  | 52(1) |
| C(105) | 6565(5)  | 4401(2) | 5823(5)  | 70(2) |

|        |          |         |          |       |
|--------|----------|---------|----------|-------|
| C(106) | 5501(5)  | 4387(2) | 6298(4)  | 58(2) |
| C(107) | 4500(5)  | 4582(1) | 5487(3)  | 44(1) |
| C(108) | 3377(5)  | 4583(1) | 5847(3)  | 41(1) |
| C(109) | 2423(4)  | 4777(1) | 4998(3)  | 36(1) |
| C(110) | 1297(5)  | 4821(2) | 5332(4)  | 49(1) |
| C(111) | 498(4)   | 5046(2) | 4386(4)  | 48(1) |
| C(112) | 996(4)   | 5414(1) | 4123(4)  | 42(1) |
| C(113) | 2209(4)  | 5369(1) | 3981(3)  | 31(1) |
| C(114) | 2889(4)  | 5734(1) | 4088(3)  | 31(1) |
| C(115) | 4119(4)  | 5695(1) | 4007(3)  | 31(1) |
| C(116) | 4973(4)  | 5945(1) | 4790(3)  | 37(1) |
| C(117) | 6136(4)  | 5926(2) | 4500(4)  | 44(1) |
| C(118) | 6082(4)  | 6008(1) | 3244(4)  | 42(1) |
| C(119) | 5183(4)  | 5745(1) | 2510(3)  | 33(1) |
| C(120) | 4884(4)  | 5842(1) | 1210(4)  | 42(1) |
| C(121) | 3918(4)  | 5610(1) | 509(3)   | 41(1) |
| C(122) | 3785(5)  | 5662(2) | -793(3)  | 46(1) |
| C(123) | 2599(5)  | 5514(2) | -1380(3) | 49(1) |
| C(124) | 1665(6)  | 5787(2) | -1898(3) | 53(1) |
| C(125) | 493(6)   | 5615(2) | -2164(4) | 60(2) |
| C(126) | -502(7)  | 5869(2) | -2722(6) | 87(2) |
| C(127) | -1505(7) | 5697(2) | -2343(6) | 89(2) |
| C(128) | -935(5)  | 5574(2) | -1097(4) | 53(1) |
| C(129) | -1483(5) | 5215(2) | -749(4)  | 53(1) |
| C(130) | -1389(6) | 4870(2) | -1445(4) | 59(2) |
| C(131) | -1819(5) | 4529(2) | -949(5)  | 59(2) |
| C(132) | -1236(5) | 4479(1) | 346(4)   | 45(1) |

|        |          |         |          |        |
|--------|----------|---------|----------|--------|
| C(133) | -1395(4) | 4844(1) | 969(4)   | 46(1)  |
| C(134) | -2593(6) | 4922(2) | 1074(7)  | 78(2)  |
| C(135) | -1689(5) | 4138(2) | 849(6)   | 63(2)  |
| C(136) | -989(6)  | 5887(2) | -242(7)  | 77(2)  |
| C(137) | 1940(8)  | 5937(2) | -3007(4) | 77(2)  |
| C(138) | 4715(6)  | 5447(2) | -1191(4) | 70(2)  |
| C(139) | 7244(5)  | 5963(2) | 2988(6)  | 61(2)  |
| C(140) | 5109(5)  | 5832(2) | 6066(4)  | 54(1)  |
| C(141) | 201(5)   | 5610(2) | 3094(5)  | 56(1)  |
| C(142) | 757(6)   | 4446(2) | 5540(6)  | 71(2)  |
| C(143) | 7351(5)  | 4314(2) | 4070(7)  | 81(2)  |
| C(144) | 4680(5)  | 3909(1) | 2484(4)  | 53(1)  |
| O(201) | 8691(3)  | 8870(1) | 8384(3)  | 45(1)  |
| O(202) | 6548(10) | 8710(3) | 2504(6)  | 126(3) |
| C(201) | 6202(10) | 8755(3) | 1511(7)  | 70(3)  |
| C(202) | 6056(11) | 8442(3) | 690(9)   | 78(3)  |
| C(203) | 6030(20) | 9134(4) | 998(19)  | 138(8) |
| O(302) | 4550(20) | 8989(7) | 542(15)  | 126(3) |
| C(301) | 5550(20) | 8969(7) | 830(20)  | 70(3)  |
| C(302) | 6040(30) | 8593(6) | 1120(30) | 78(3)  |
| C(303) | 6350(50) | 9288(8) | 1000(60) | 138(8) |

---

Table S4. Bond lengths [ $\text{\AA}$ ] and angles [ $^\circ$ ] for terrosamycin A (**1**).

---

|            |          |
|------------|----------|
| K(1)-O(13) | 2.683(3) |
| K(1)-O(5)  | 2.761(3) |
| K(1)-O(2)  | 2.778(3) |
| K(1)-O(11) | 2.833(3) |
| K(1)-O(8)  | 2.935(3) |
| K(1)-O(12) | 2.957(3) |
| K(1)-O(1)  | 3.024(3) |
| K(1)-O(9)  | 3.025(4) |
| K(1)-H(5)  | 2.26(13) |
| K(1)-H(13) | 2.95(13) |
| O(1)-C(1)  | 1.274(5) |
| O(2)-C(1)  | 1.229(5) |
| O(3)-C(7)  | 1.415(6) |
| O(3)-C(3)  | 1.431(5) |
| O(4)-C(13) | 1.411(5) |
| O(4)-C(9)  | 1.439(5) |
| O(5)-C(13) | 1.387(5) |
| O(5)-H(5)  | 0.81(6)  |
| O(6)-C(15) | 1.415(5) |
| O(6)-C(19) | 1.455(4) |
| O(7)-C(19) | 1.399(5) |
| O(7)-H(7)  | 0.8400   |
| O(8)-C(21) | 1.453(5) |
| O(8)-H(8)  | 0.81(6)  |
| O(9)-C(23) | 1.211(6) |

|             |          |
|-------------|----------|
| O(10)-C(24) | 1.415(6) |
| O(10)-H(10) | 0.8400   |
| O(11)-C(25) | 1.433(6) |
| O(11)-C(28) | 1.460(5) |
| O(12)-C(29) | 1.418(6) |
| O(12)-C(33) | 1.460(6) |
| O(13)-C(32) | 1.452(5) |
| O(13)-H(13) | 0.81(6)  |
| C(1)-C(2)   | 1.543(6) |
| C(2)-C(3)   | 1.511(7) |
| C(2)-C(44)  | 1.516(7) |
| C(2)-H(2)   | 1.0000   |
| C(3)-C(4)   | 1.534(6) |
| C(3)-H(3)   | 1.0000   |
| C(4)-C(5)   | 1.513(9) |
| C(4)-C(43)  | 1.548(8) |
| C(4)-H(4)   | 1.0000   |
| C(5)-C(6)   | 1.530(9) |
| C(5)-H(5A)  | 0.9900   |
| C(5)-H(5B)  | 0.9900   |
| C(6)-C(7)   | 1.524(7) |
| C(6)-H(6A)  | 0.9900   |
| C(6)-H(6B)  | 0.9900   |
| C(7)-C(8)   | 1.511(7) |
| C(7)-H(7A)  | 1.0000   |
| C(8)-C(9)   | 1.503(7) |
| C(8)-H(8A)  | 0.9900   |

|              |          |
|--------------|----------|
| C(8)-H(8B)   | 0.9900   |
| C(9)-C(10)   | 1.533(6) |
| C(9)-H(9)    | 1.0000   |
| C(10)-C(11)  | 1.501(9) |
| C(10)-C(42)  | 1.547(8) |
| C(10)-H(10A) | 1.0000   |
| C(11)-C(12)  | 1.541(8) |
| C(11)-H(11A) | 0.9900   |
| C(11)-H(11B) | 0.9900   |
| C(12)-C(41)  | 1.499(8) |
| C(12)-C(13)  | 1.559(5) |
| C(12)-H(12)  | 1.0000   |
| C(13)-C(14)  | 1.535(6) |
| C(14)-C(15)  | 1.547(5) |
| C(14)-H(14A) | 0.9900   |
| C(14)-H(14B) | 0.9900   |
| C(15)-C(16)  | 1.515(6) |
| C(15)-H(15)  | 1.0000   |
| C(16)-C(40)  | 1.502(8) |
| C(16)-C(17)  | 1.550(6) |
| C(16)-H(16)  | 1.0000   |
| C(17)-C(18)  | 1.503(7) |
| C(17)-H(17A) | 0.9900   |
| C(17)-H(17B) | 0.9900   |
| C(18)-C(19)  | 1.535(6) |
| C(18)-C(39)  | 1.542(5) |
| C(18)-H(18)  | 1.0000   |

|              |          |
|--------------|----------|
| C(19)-C(20)  | 1.506(7) |
| C(20)-C(21)  | 1.525(7) |
| C(20)-H(20A) | 0.9900   |
| C(20)-H(20B) | 0.9900   |
| C(21)-C(22)  | 1.524(7) |
| C(21)-H(21)  | 1.0000   |
| C(22)-C(23)  | 1.519(7) |
| C(22)-C(38)  | 1.544(7) |
| C(22)-H(22)  | 1.0000   |
| C(23)-C(24)  | 1.530(7) |
| C(24)-C(25)  | 1.523(7) |
| C(24)-C(37)  | 1.526(7) |
| C(25)-C(26)  | 1.526(7) |
| C(25)-H(25)  | 1.0000   |
| C(26)-C(27)  | 1.503(9) |
| C(26)-H(26A) | 0.9900   |
| C(26)-H(26B) | 0.9900   |
| C(27)-C(28)  | 1.526(8) |
| C(27)-H(27A) | 0.9900   |
| C(27)-H(27B) | 0.9900   |
| C(28)-C(36)  | 1.515(8) |
| C(28)-C(29)  | 1.528(7) |
| C(29)-C(30)  | 1.519(8) |
| C(29)-H(29)  | 1.0000   |
| C(30)-C(31)  | 1.507(8) |
| C(30)-H(30A) | 0.9900   |
| C(30)-H(30B) | 0.9900   |

|              |          |
|--------------|----------|
| C(31)-C(32)  | 1.536(8) |
| C(31)-H(31A) | 0.9900   |
| C(31)-H(31B) | 0.9900   |
| C(32)-C(33)  | 1.504(7) |
| C(32)-C(35)  | 1.516(8) |
| C(33)-C(34)  | 1.521(7) |
| C(33)-H(33)  | 1.0000   |
| C(34)-H(34A) | 0.9800   |
| C(34)-H(34B) | 0.9800   |
| C(34)-H(34C) | 0.9800   |
| C(35)-H(35A) | 0.9800   |
| C(35)-H(35B) | 0.9800   |
| C(35)-H(35C) | 0.9800   |
| C(36)-H(36A) | 0.9800   |
| C(36)-H(36B) | 0.9800   |
| C(36)-H(36C) | 0.9800   |
| C(37)-H(37A) | 0.9800   |
| C(37)-H(37B) | 0.9800   |
| C(37)-H(37C) | 0.9800   |
| C(38)-H(38A) | 0.9800   |
| C(38)-H(38B) | 0.9800   |
| C(38)-H(38C) | 0.9800   |
| C(39)-H(39A) | 0.9800   |
| C(39)-H(39B) | 0.9800   |
| C(39)-H(39C) | 0.9800   |
| C(40)-H(40A) | 0.9800   |
| C(40)-H(40B) | 0.9800   |



|               |          |
|---------------|----------|
| C(40)-H(40C)  | 0.9800   |
| C(41)-H(41A)  | 0.9800   |
| C(41)-H(41B)  | 0.9800   |
| C(41)-H(41C)  | 0.9800   |
| C(42)-H(42A)  | 0.9800   |
| C(42)-H(42B)  | 0.9800   |
| C(42)-H(42C)  | 0.9800   |
| C(43)-H(43A)  | 0.9800   |
| C(43)-H(43B)  | 0.9800   |
| C(43)-H(43C)  | 0.9800   |
| C(44)-H(44A)  | 0.9800   |
| C(44)-H(44B)  | 0.9800   |
| C(44)-H(44C)  | 0.9800   |
| K(2)-O(113)   | 2.689(4) |
| K(2)-O(105)   | 2.768(3) |
| K(2)-O(101)   | 2.810(4) |
| K(2)-O(111)   | 2.838(3) |
| K(2)-O(112)   | 2.928(4) |
| K(2)-O(108)   | 2.953(4) |
| K(2)-O(109)   | 2.987(4) |
| K(2)-O(102)   | 3.013(3) |
| K(2)-H(105)   | 2.80(13) |
| K(2)-H(108)   | 2.31(11) |
| K(2)-H(113)   | 3.00(13) |
| O(101)-C(101) | 1.238(6) |
| O(102)-C(101) | 1.262(5) |
| O(103)-C(103) | 1.435(6) |

|               |          |
|---------------|----------|
| O(103)-C(107) | 1.439(5) |
| O(104)-C(113) | 1.411(5) |
| O(104)-C(109) | 1.450(5) |
| O(105)-C(113) | 1.426(4) |
| O(105)-H(105) | 0.81(6)  |
| O(106)-C(119) | 1.432(5) |
| O(106)-C(115) | 1.464(4) |
| O(107)-C(119) | 1.403(5) |
| O(107)-H(107) | 0.8400   |
| O(108)-C(121) | 1.441(6) |
| O(108)-H(108) | 0.81(6)  |
| O(109)-C(123) | 1.231(6) |
| O(110)-C(124) | 1.440(6) |
| O(110)-H(110) | 0.8400   |
| O(111)-C(128) | 1.419(7) |
| O(111)-C(125) | 1.471(6) |
| O(112)-C(129) | 1.441(6) |
| O(112)-C(133) | 1.446(6) |
| O(113)-C(132) | 1.428(7) |
| O(113)-H(113) | 0.81(6)  |
| C(101)-C(102) | 1.535(7) |
| C(102)-C(103) | 1.532(6) |
| C(102)-C(144) | 1.539(7) |
| C(102)-H(102) | 1.0000   |
| C(103)-C(104) | 1.515(7) |
| C(103)-H(103) | 1.0000   |
| C(104)-C(143) | 1.530(9) |

|               |           |
|---------------|-----------|
| C(104)-C(105) | 1.536(8)  |
| C(104)-H(104) | 1.0000    |
| C(105)-C(106) | 1.519(10) |
| C(105)-H(10B) | 0.9900    |
| C(105)-H(10C) | 0.9900    |
| C(106)-C(107) | 1.525(7)  |
| C(106)-H(10D) | 0.9900    |
| C(106)-H(10E) | 0.9900    |
| C(107)-C(108) | 1.510(7)  |
| C(107)-H(10F) | 1.0000    |
| C(108)-C(109) | 1.509(7)  |
| C(108)-H(10G) | 0.9900    |
| C(108)-H(10H) | 0.9900    |
| C(109)-C(110) | 1.508(7)  |
| C(109)-H(109) | 1.0000    |
| C(110)-C(111) | 1.529(8)  |
| C(110)-C(142) | 1.539(8)  |
| C(110)-H(11C) | 1.0000    |
| C(111)-C(112) | 1.513(7)  |
| C(111)-H(11D) | 0.9900    |
| C(111)-H(11E) | 0.9900    |
| C(112)-C(113) | 1.516(6)  |
| C(112)-C(141) | 1.538(8)  |
| C(112)-H(112) | 1.0000    |
| C(113)-C(114) | 1.527(6)  |
| C(114)-C(115) | 1.509(6)  |
| C(114)-H(11F) | 0.9900    |

|               |           |
|---------------|-----------|
| C(114)-H(11G) | 0.9900    |
| C(115)-C(116) | 1.508(6)  |
| C(115)-H(115) | 1.0000    |
| C(116)-C(117) | 1.520(7)  |
| C(116)-C(140) | 1.556(6)  |
| C(116)-H(116) | 1.0000    |
| C(117)-C(118) | 1.524(7)  |
| C(117)-H(11H) | 0.9900    |
| C(117)-H(11I) | 0.9900    |
| C(118)-C(139) | 1.506(7)  |
| C(118)-C(119) | 1.541(6)  |
| C(118)-H(118) | 1.0000    |
| C(119)-C(120) | 1.556(6)  |
| C(120)-C(121) | 1.510(7)  |
| C(120)-H(12A) | 0.9900    |
| C(120)-H(12B) | 0.9900    |
| C(121)-C(122) | 1.545(5)  |
| C(121)-H(121) | 1.0000    |
| C(122)-C(123) | 1.524(8)  |
| C(122)-C(138) | 1.526(8)  |
| C(122)-H(122) | 1.0000    |
| C(123)-C(124) | 1.505(8)  |
| C(124)-C(125) | 1.499(9)  |
| C(124)-C(137) | 1.545(6)  |
| C(125)-C(126) | 1.526(10) |
| C(125)-H(125) | 1.0000    |
| C(126)-C(127) | 1.517(11) |

|               |          |
|---------------|----------|
| C(126)-H(12C) | 0.9900   |
| C(126)-H(12D) | 0.9900   |
| C(127)-C(128) | 1.553(8) |
| C(127)-H(12E) | 0.9900   |
| C(127)-H(12F) | 0.9900   |
| C(128)-C(136) | 1.532(9) |
| C(128)-C(129) | 1.546(8) |
| C(129)-C(130) | 1.513(8) |
| C(129)-H(129) | 1.0000   |
| C(130)-C(131) | 1.501(9) |
| C(130)-H(13A) | 0.9900   |
| C(130)-H(13B) | 0.9900   |
| C(131)-C(132) | 1.558(7) |
| C(131)-H(13C) | 0.9900   |
| C(131)-H(13D) | 0.9900   |
| C(132)-C(135) | 1.520(8) |
| C(132)-C(133) | 1.538(7) |
| C(133)-C(134) | 1.500(8) |
| C(133)-H(133) | 1.0000   |
| C(134)-H(13E) | 0.9800   |
| C(134)-H(13F) | 0.9800   |
| C(134)-H(13G) | 0.9800   |
| C(135)-H(13H) | 0.9800   |
| C(135)-H(13I) | 0.9800   |
| C(135)-H(13J) | 0.9800   |
| C(136)-H(13K) | 0.9800   |
| C(136)-H(13L) | 0.9800   |

|               |         |
|---------------|---------|
| C(136)-H(13M) | 0.9800  |
| C(137)-H(13N) | 0.9800  |
| C(137)-H(13O) | 0.9800  |
| C(137)-H(13P) | 0.9800  |
| C(138)-H(13Q) | 0.9800  |
| C(138)-H(13R) | 0.9800  |
| C(138)-H(13S) | 0.9800  |
| C(139)-H(13T) | 0.9800  |
| C(139)-H(13U) | 0.9800  |
| C(139)-H(13V) | 0.9800  |
| C(140)-H(14C) | 0.9800  |
| C(140)-H(14D) | 0.9800  |
| C(140)-H(14E) | 0.9800  |
| C(141)-H(14F) | 0.9800  |
| C(141)-H(14G) | 0.9800  |
| C(141)-H(14H) | 0.9800  |
| C(142)-H(14I) | 0.9800  |
| C(142)-H(14J) | 0.9800  |
| C(142)-H(14K) | 0.9800  |
| C(143)-H(14L) | 0.9800  |
| C(143)-H(14M) | 0.9800  |
| C(143)-H(14N) | 0.9800  |
| C(144)-H(14O) | 0.9800  |
| C(144)-H(14P) | 0.9800  |
| C(144)-H(14Q) | 0.9800  |
| O(201)-H(201) | 0.90(9) |
| O(201)-H(202) | 0.90(9) |

|                  |            |
|------------------|------------|
| O(202)-C(201)    | 1.177(10)  |
| C(201)-C(202)    | 1.476(10)  |
| C(201)-C(203)    | 1.485(11)  |
| C(202)-H(20C)    | 0.9800     |
| C(202)-H(20D)    | 0.9800     |
| C(202)-H(20E)    | 0.9800     |
| C(203)-H(20F)    | 0.9800     |
| C(203)-H(20G)    | 0.9800     |
| C(203)-H(20H)    | 0.9800     |
| O(302)-C(301)    | 1.173(14)  |
| C(301)-C(302)    | 1.475(13)  |
| C(301)-C(303)    | 1.475(13)  |
| C(302)-H(30C)    | 0.9800     |
| C(302)-H(30D)    | 0.9800     |
| C(302)-H(30E)    | 0.9800     |
| C(303)-H(30F)    | 0.9800     |
| C(303)-H(30G)    | 0.9800     |
| C(303)-H(30H)    | 0.9800     |
| O(13)-K(1)-O(5)  | 108.01(12) |
| O(13)-K(1)-O(2)  | 76.92(10)  |
| O(5)-K(1)-O(2)   | 80.75(10)  |
| O(13)-K(1)-O(11) | 99.96(11)  |
| O(5)-K(1)-O(11)  | 121.65(11) |
| O(2)-K(1)-O(11)  | 156.58(11) |
| O(13)-K(1)-O(8)  | 170.94(10) |
| O(5)-K(1)-O(8)   | 69.48(9)   |

|                  |            |
|------------------|------------|
| O(2)-K(1)-O(8)   | 110.70(9)  |
| O(11)-K(1)-O(8)  | 75.04(10)  |
| O(13)-K(1)-O(12) | 58.22(10)  |
| O(5)-K(1)-O(12)  | 95.21(9)   |
| O(2)-K(1)-O(12)  | 131.40(10) |
| O(11)-K(1)-O(12) | 58.73(9)   |
| O(8)-K(1)-O(12)  | 112.92(9)  |
| O(13)-K(1)-O(1)  | 118.20(10) |
| O(5)-K(1)-O(1)   | 54.78(8)   |
| O(2)-K(1)-O(1)   | 44.26(8)   |
| O(11)-K(1)-O(1)  | 141.22(9)  |
| O(8)-K(1)-O(1)   | 68.00(8)   |
| O(12)-K(1)-O(1)  | 148.74(9)  |
| O(13)-K(1)-O(9)  | 120.47(12) |
| O(5)-K(1)-O(9)   | 130.38(10) |
| O(2)-K(1)-O(9)   | 99.50(10)  |
| O(11)-K(1)-O(9)  | 61.65(10)  |
| O(8)-K(1)-O(9)   | 64.16(10)  |
| O(12)-K(1)-O(9)  | 118.04(10) |
| O(1)-K(1)-O(9)   | 91.11(9)   |
| O(13)-K(1)-H(5)  | 93(2)      |
| O(5)-K(1)-H(5)   | 15(2)      |
| O(2)-K(1)-H(5)   | 77(4)      |
| O(11)-K(1)-H(5)  | 126(4)     |
| O(8)-K(1)-H(5)   | 84(2)      |
| O(12)-K(1)-H(5)  | 87(3)      |
| O(1)-K(1)-H(5)   | 62(3)      |



|                   |          |
|-------------------|----------|
| O(9)-K(1)-H(5)    | 145(2)   |
| O(13)-K(1)-H(13)  | 15.6(16) |
| O(5)-K(1)-H(13)   | 106(3)   |
| O(2)-K(1)-H(13)   | 61.5(17) |
| O(11)-K(1)-H(13)  | 113(2)   |
| O(8)-K(1)-H(13)   | 172(2)   |
| O(12)-K(1)-H(13)  | 73.7(17) |
| O(1)-K(1)-H(13)   | 104(2)   |
| O(9)-K(1)-H(13)   | 118(3)   |
| H(5)-K(1)-H(13)   | 92(4)    |
| C(1)-O(1)-K(1)    | 89.9(2)  |
| C(1)-O(2)-K(1)    | 102.9(3) |
| C(7)-O(3)-C(3)    | 113.7(3) |
| C(13)-O(4)-C(9)   | 116.6(3) |
| C(13)-O(5)-K(1)   | 165.2(2) |
| C(13)-O(5)-H(5)   | 128(10)  |
| K(1)-O(5)-H(5)    | 45(10)   |
| C(15)-O(6)-C(19)  | 117.0(3) |
| C(19)-O(7)-H(7)   | 109.5    |
| C(21)-O(8)-K(1)   | 108.2(3) |
| C(21)-O(8)-H(8)   | 93(10)   |
| K(1)-O(8)-H(8)    | 99(10)   |
| C(23)-O(9)-K(1)   | 103.3(3) |
| C(24)-O(10)-H(10) | 109.5    |
| C(25)-O(11)-C(28) | 110.8(3) |
| C(25)-O(11)-K(1)  | 128.2(3) |
| C(28)-O(11)-K(1)  | 119.3(3) |

|                   |          |
|-------------------|----------|
| C(29)-O(12)-C(33) | 114.8(4) |
| C(29)-O(12)-K(1)  | 107.2(2) |
| C(33)-O(12)-K(1)  | 107.8(2) |
| C(32)-O(13)-K(1)  | 127.5(3) |
| C(32)-O(13)-H(13) | 131(10)  |
| K(1)-O(13)-H(13)  | 101(10)  |
| O(2)-C(1)-O(1)    | 122.8(4) |
| O(2)-C(1)-C(2)    | 120.6(4) |
| O(1)-C(1)-C(2)    | 116.6(4) |
| C(3)-C(2)-C(44)   | 114.0(4) |
| C(3)-C(2)-C(1)    | 108.4(4) |
| C(44)-C(2)-C(1)   | 112.6(4) |
| C(3)-C(2)-H(2)    | 107.2    |
| C(44)-C(2)-H(2)   | 107.2    |
| C(1)-C(2)-H(2)    | 107.2    |
| O(3)-C(3)-C(2)    | 107.1(3) |
| O(3)-C(3)-C(4)    | 109.1(4) |
| C(2)-C(3)-C(4)    | 117.3(4) |
| O(3)-C(3)-H(3)    | 107.7    |
| C(2)-C(3)-H(3)    | 107.7    |
| C(4)-C(3)-H(3)    | 107.7    |
| C(5)-C(4)-C(3)    | 110.2(5) |
| C(5)-C(4)-C(43)   | 111.0(5) |
| C(3)-C(4)-C(43)   | 110.3(5) |
| C(5)-C(4)-H(4)    | 108.4    |
| C(3)-C(4)-H(4)    | 108.4    |
| C(43)-C(4)-H(4)   | 108.4    |

|                  |          |
|------------------|----------|
| C(4)-C(5)-C(6)   | 111.7(4) |
| C(4)-C(5)-H(5A)  | 109.3    |
| C(6)-C(5)-H(5A)  | 109.3    |
| C(4)-C(5)-H(5B)  | 109.3    |
| C(6)-C(5)-H(5B)  | 109.3    |
| H(5A)-C(5)-H(5B) | 107.9    |
| C(7)-C(6)-C(5)   | 109.4(5) |
| C(7)-C(6)-H(6A)  | 109.8    |
| C(5)-C(6)-H(6A)  | 109.8    |
| C(7)-C(6)-H(6B)  | 109.8    |
| C(5)-C(6)-H(6B)  | 109.8    |
| H(6A)-C(6)-H(6B) | 108.2    |
| O(3)-C(7)-C(8)   | 108.2(4) |
| O(3)-C(7)-C(6)   | 109.7(4) |
| C(8)-C(7)-C(6)   | 115.8(5) |
| O(3)-C(7)-H(7A)  | 107.6    |
| C(8)-C(7)-H(7A)  | 107.6    |
| C(6)-C(7)-H(7A)  | 107.6    |
| C(9)-C(8)-C(7)   | 111.7(4) |
| C(9)-C(8)-H(8A)  | 109.3    |
| C(7)-C(8)-H(8A)  | 109.3    |
| C(9)-C(8)-H(8B)  | 109.3    |
| C(7)-C(8)-H(8B)  | 109.3    |
| H(8A)-C(8)-H(8B) | 107.9    |
| O(4)-C(9)-C(8)   | 105.9(3) |
| O(4)-C(9)-C(10)  | 107.6(4) |
| C(8)-C(9)-C(10)  | 116.1(4) |

|                     |          |
|---------------------|----------|
| O(4)-C(9)-H(9)      | 109.0    |
| C(8)-C(9)-H(9)      | 109.0    |
| C(10)-C(9)-H(9)     | 109.0    |
| C(11)-C(10)-C(9)    | 108.3(4) |
| C(11)-C(10)-C(42)   | 112.0(5) |
| C(9)-C(10)-C(42)    | 111.8(5) |
| C(11)-C(10)-H(10A)  | 108.2    |
| C(9)-C(10)-H(10A)   | 108.2    |
| C(42)-C(10)-H(10A)  | 108.2    |
| C(10)-C(11)-C(12)   | 114.8(4) |
| C(10)-C(11)-H(11A)  | 108.6    |
| C(12)-C(11)-H(11A)  | 108.6    |
| C(10)-C(11)-H(11B)  | 108.6    |
| C(12)-C(11)-H(11B)  | 108.6    |
| H(11A)-C(11)-H(11B) | 107.6    |
| C(41)-C(12)-C(11)   | 112.2(4) |
| C(41)-C(12)-C(13)   | 112.9(4) |
| C(11)-C(12)-C(13)   | 108.8(4) |
| C(41)-C(12)-H(12)   | 107.5    |
| C(11)-C(12)-H(12)   | 107.5    |
| C(13)-C(12)-H(12)   | 107.5    |
| O(5)-C(13)-O(4)     | 112.1(4) |
| O(5)-C(13)-C(14)    | 113.2(3) |
| O(4)-C(13)-C(14)    | 103.2(3) |
| O(5)-C(13)-C(12)    | 106.6(3) |
| O(4)-C(13)-C(12)    | 110.4(4) |
| C(14)-C(13)-C(12)   | 111.5(4) |

|                     |          |
|---------------------|----------|
| C(13)-C(14)-C(15)   | 114.1(3) |
| C(13)-C(14)-H(14A)  | 108.7    |
| C(15)-C(14)-H(14A)  | 108.7    |
| C(13)-C(14)-H(14B)  | 108.7    |
| C(15)-C(14)-H(14B)  | 108.7    |
| H(14A)-C(14)-H(14B) | 107.6    |
| O(6)-C(15)-C(16)    | 111.9(3) |
| O(6)-C(15)-C(14)    | 105.7(3) |
| C(16)-C(15)-C(14)   | 113.8(4) |
| O(6)-C(15)-H(15)    | 108.4    |
| C(16)-C(15)-H(15)   | 108.4    |
| C(14)-C(15)-H(15)   | 108.4    |
| C(40)-C(16)-C(15)   | 113.9(4) |
| C(40)-C(16)-C(17)   | 110.5(4) |
| C(15)-C(16)-C(17)   | 107.1(4) |
| C(40)-C(16)-H(16)   | 108.4    |
| C(15)-C(16)-H(16)   | 108.4    |
| C(17)-C(16)-H(16)   | 108.4    |
| C(18)-C(17)-C(16)   | 113.4(4) |
| C(18)-C(17)-H(17A)  | 108.9    |
| C(16)-C(17)-H(17A)  | 108.9    |
| C(18)-C(17)-H(17B)  | 108.9    |
| C(16)-C(17)-H(17B)  | 108.9    |
| H(17A)-C(17)-H(17B) | 107.7    |
| C(17)-C(18)-C(19)   | 110.3(4) |
| C(17)-C(18)-C(39)   | 110.5(4) |
| C(19)-C(18)-C(39)   | 111.9(4) |

|                     |          |
|---------------------|----------|
| C(17)-C(18)-H(18)   | 108.0    |
| C(19)-C(18)-H(18)   | 108.0    |
| C(39)-C(18)-H(18)   | 108.0    |
| O(7)-C(19)-O(6)     | 109.9(3) |
| O(7)-C(19)-C(20)    | 114.2(4) |
| O(6)-C(19)-C(20)    | 104.1(3) |
| O(7)-C(19)-C(18)    | 107.1(3) |
| O(6)-C(19)-C(18)    | 107.9(3) |
| C(20)-C(19)-C(18)   | 113.4(4) |
| C(19)-C(20)-C(21)   | 115.8(4) |
| C(19)-C(20)-H(20A)  | 108.3    |
| C(21)-C(20)-H(20A)  | 108.3    |
| C(19)-C(20)-H(20B)  | 108.3    |
| C(21)-C(20)-H(20B)  | 108.3    |
| H(20A)-C(20)-H(20B) | 107.4    |
| O(8)-C(21)-C(22)    | 106.2(3) |
| O(8)-C(21)-C(20)    | 110.9(4) |
| C(22)-C(21)-C(20)   | 113.1(4) |
| O(8)-C(21)-H(21)    | 108.8    |
| C(22)-C(21)-H(21)   | 108.8    |
| C(20)-C(21)-H(21)   | 108.8    |
| C(23)-C(22)-C(21)   | 107.0(3) |
| C(23)-C(22)-C(38)   | 109.9(5) |
| C(21)-C(22)-C(38)   | 111.6(4) |
| C(23)-C(22)-H(22)   | 109.4    |
| C(21)-C(22)-H(22)   | 109.4    |
| C(38)-C(22)-H(22)   | 109.4    |

|                     |          |
|---------------------|----------|
| O(9)-C(23)-C(22)    | 120.6(4) |
| O(9)-C(23)-C(24)    | 121.5(4) |
| C(22)-C(23)-C(24)   | 117.9(4) |
| O(10)-C(24)-C(25)   | 110.2(4) |
| O(10)-C(24)-C(37)   | 107.7(4) |
| C(25)-C(24)-C(37)   | 111.3(4) |
| O(10)-C(24)-C(23)   | 111.1(4) |
| C(25)-C(24)-C(23)   | 110.8(4) |
| C(37)-C(24)-C(23)   | 105.6(4) |
| O(11)-C(25)-C(24)   | 109.7(4) |
| O(11)-C(25)-C(26)   | 105.6(4) |
| C(24)-C(25)-C(26)   | 115.7(5) |
| O(11)-C(25)-H(25)   | 108.5    |
| C(24)-C(25)-H(25)   | 108.5    |
| C(26)-C(25)-H(25)   | 108.5    |
| C(27)-C(26)-C(25)   | 102.2(5) |
| C(27)-C(26)-H(26A)  | 111.3    |
| C(25)-C(26)-H(26A)  | 111.3    |
| C(27)-C(26)-H(26B)  | 111.3    |
| C(25)-C(26)-H(26B)  | 111.3    |
| H(26A)-C(26)-H(26B) | 109.2    |
| C(26)-C(27)-C(28)   | 103.9(4) |
| C(26)-C(27)-H(27A)  | 111.0    |
| C(28)-C(27)-H(27A)  | 111.0    |
| C(26)-C(27)-H(27B)  | 111.0    |
| C(28)-C(27)-H(27B)  | 111.0    |
| H(27A)-C(27)-H(27B) | 109.0    |

|                     |          |
|---------------------|----------|
| O(11)-C(28)-C(36)   | 107.1(4) |
| O(11)-C(28)-C(27)   | 104.1(4) |
| C(36)-C(28)-C(27)   | 111.6(5) |
| O(11)-C(28)-C(29)   | 107.8(4) |
| C(36)-C(28)-C(29)   | 110.6(4) |
| C(27)-C(28)-C(29)   | 115.0(5) |
| O(12)-C(29)-C(30)   | 110.2(4) |
| O(12)-C(29)-C(28)   | 107.2(4) |
| C(30)-C(29)-C(28)   | 116.1(4) |
| O(12)-C(29)-H(29)   | 107.7    |
| C(30)-C(29)-H(29)   | 107.7    |
| C(28)-C(29)-H(29)   | 107.7    |
| C(31)-C(30)-C(29)   | 111.8(4) |
| C(31)-C(30)-H(30A)  | 109.3    |
| C(29)-C(30)-H(30A)  | 109.3    |
| C(31)-C(30)-H(30B)  | 109.3    |
| C(29)-C(30)-H(30B)  | 109.3    |
| H(30A)-C(30)-H(30B) | 107.9    |
| C(30)-C(31)-C(32)   | 111.6(4) |
| C(30)-C(31)-H(31A)  | 109.3    |
| C(32)-C(31)-H(31A)  | 109.3    |
| C(30)-C(31)-H(31B)  | 109.3    |
| C(32)-C(31)-H(31B)  | 109.3    |
| H(31A)-C(31)-H(31B) | 108.0    |
| O(13)-C(32)-C(33)   | 105.8(4) |
| O(13)-C(32)-C(35)   | 108.5(4) |
| C(33)-C(32)-C(35)   | 113.6(5) |



|                     |          |
|---------------------|----------|
| O(13)-C(32)-C(31)   | 106.5(4) |
| C(33)-C(32)-C(31)   | 109.4(4) |
| C(35)-C(32)-C(31)   | 112.6(4) |
| O(12)-C(33)-C(32)   | 109.9(4) |
| O(12)-C(33)-C(34)   | 111.0(4) |
| C(32)-C(33)-C(34)   | 117.0(4) |
| O(12)-C(33)-H(33)   | 106.0    |
| C(32)-C(33)-H(33)   | 106.0    |
| C(34)-C(33)-H(33)   | 106.0    |
| C(33)-C(34)-H(34A)  | 109.5    |
| C(33)-C(34)-H(34B)  | 109.5    |
| H(34A)-C(34)-H(34B) | 109.5    |
| C(33)-C(34)-H(34C)  | 109.5    |
| H(34A)-C(34)-H(34C) | 109.5    |
| H(34B)-C(34)-H(34C) | 109.5    |
| C(32)-C(35)-H(35A)  | 109.5    |
| C(32)-C(35)-H(35B)  | 109.5    |
| H(35A)-C(35)-H(35B) | 109.5    |
| C(32)-C(35)-H(35C)  | 109.5    |
| H(35A)-C(35)-H(35C) | 109.5    |
| H(35B)-C(35)-H(35C) | 109.5    |
| C(28)-C(36)-H(36A)  | 109.5    |
| C(28)-C(36)-H(36B)  | 109.5    |
| H(36A)-C(36)-H(36B) | 109.5    |
| C(28)-C(36)-H(36C)  | 109.5    |
| H(36A)-C(36)-H(36C) | 109.5    |
| H(36B)-C(36)-H(36C) | 109.5    |

|                     |       |
|---------------------|-------|
| C(24)-C(37)-H(37A)  | 109.5 |
| C(24)-C(37)-H(37B)  | 109.5 |
| H(37A)-C(37)-H(37B) | 109.5 |
| C(24)-C(37)-H(37C)  | 109.5 |
| H(37A)-C(37)-H(37C) | 109.5 |
| H(37B)-C(37)-H(37C) | 109.5 |
| C(22)-C(38)-H(38A)  | 109.5 |
| C(22)-C(38)-H(38B)  | 109.5 |
| H(38A)-C(38)-H(38B) | 109.5 |
| C(22)-C(38)-H(38C)  | 109.5 |
| H(38A)-C(38)-H(38C) | 109.5 |
| H(38B)-C(38)-H(38C) | 109.5 |
| C(18)-C(39)-H(39A)  | 109.5 |
| C(18)-C(39)-H(39B)  | 109.5 |
| H(39A)-C(39)-H(39B) | 109.5 |
| C(18)-C(39)-H(39C)  | 109.5 |
| H(39A)-C(39)-H(39C) | 109.5 |
| H(39B)-C(39)-H(39C) | 109.5 |
| C(16)-C(40)-H(40A)  | 109.5 |
| C(16)-C(40)-H(40B)  | 109.5 |
| H(40A)-C(40)-H(40B) | 109.5 |
| C(16)-C(40)-H(40C)  | 109.5 |
| H(40A)-C(40)-H(40C) | 109.5 |
| H(40B)-C(40)-H(40C) | 109.5 |
| C(12)-C(41)-H(41A)  | 109.5 |
| C(12)-C(41)-H(41B)  | 109.5 |
| H(41A)-C(41)-H(41B) | 109.5 |

|                     |            |
|---------------------|------------|
| C(12)-C(41)-H(41C)  | 109.5      |
| H(41A)-C(41)-H(41C) | 109.5      |
| H(41B)-C(41)-H(41C) | 109.5      |
| C(10)-C(42)-H(42A)  | 109.5      |
| C(10)-C(42)-H(42B)  | 109.5      |
| H(42A)-C(42)-H(42B) | 109.5      |
| C(10)-C(42)-H(42C)  | 109.5      |
| H(42A)-C(42)-H(42C) | 109.5      |
| H(42B)-C(42)-H(42C) | 109.5      |
| C(4)-C(43)-H(43A)   | 109.5      |
| C(4)-C(43)-H(43B)   | 109.5      |
| H(43A)-C(43)-H(43B) | 109.5      |
| C(4)-C(43)-H(43C)   | 109.5      |
| H(43A)-C(43)-H(43C) | 109.5      |
| H(43B)-C(43)-H(43C) | 109.5      |
| C(2)-C(44)-H(44A)   | 109.5      |
| C(2)-C(44)-H(44B)   | 109.5      |
| H(44A)-C(44)-H(44B) | 109.5      |
| C(2)-C(44)-H(44C)   | 109.5      |
| H(44A)-C(44)-H(44C) | 109.5      |
| H(44B)-C(44)-H(44C) | 109.5      |
| O(113)-K(2)-O(105)  | 106.47(10) |
| O(113)-K(2)-O(101)  | 77.93(11)  |
| O(105)-K(2)-O(101)  | 78.81(10)  |
| O(113)-K(2)-O(111)  | 99.82(11)  |
| O(105)-K(2)-O(111)  | 121.53(10) |
| O(101)-K(2)-O(111)  | 158.75(11) |

|                    |            |
|--------------------|------------|
| O(113)-K(2)-O(112) | 58.47(10)  |
| O(105)-K(2)-O(112) | 92.87(9)   |
| O(101)-K(2)-O(112) | 131.33(11) |
| O(111)-K(2)-O(112) | 59.07(10)  |
| O(113)-K(2)-O(108) | 170.12(11) |
| O(105)-K(2)-O(108) | 73.52(9)   |
| O(101)-K(2)-O(108) | 111.48(11) |
| O(111)-K(2)-O(108) | 72.55(10)  |
| O(112)-K(2)-O(108) | 111.69(10) |
| O(113)-K(2)-O(109) | 117.86(12) |
| O(105)-K(2)-O(109) | 134.51(12) |
| O(101)-K(2)-O(109) | 100.07(12) |
| O(111)-K(2)-O(109) | 61.94(12)  |
| O(112)-K(2)-O(109) | 118.06(12) |
| O(108)-K(2)-O(109) | 64.62(10)  |
| O(113)-K(2)-O(102) | 119.30(10) |
| O(105)-K(2)-O(102) | 54.69(8)   |
| O(101)-K(2)-O(102) | 44.16(9)   |
| O(111)-K(2)-O(102) | 140.52(10) |
| O(112)-K(2)-O(102) | 146.82(8)  |
| O(108)-K(2)-O(102) | 69.09(9)   |
| O(109)-K(2)-O(102) | 92.83(11)  |
| O(113)-K(2)-H(105) | 111(3)     |
| O(105)-K(2)-H(105) | 16.7(13)   |
| O(101)-K(2)-H(105) | 66(2)      |
| O(111)-K(2)-H(105) | 133(3)     |
| O(112)-K(2)-H(105) | 109.1(15)  |

|                      |           |
|----------------------|-----------|
| O(108)-K(2)-H(105)   | 72(3)     |
| O(109)-K(2)-H(105)   | 124(2)    |
| O(102)-K(2)-H(105)   | 38.1(14)  |
| O(113)-K(2)-H(108)   | 160(3)    |
| O(105)-K(2)-H(108)   | 77(3)     |
| O(101)-K(2)-H(108)   | 122(3)    |
| O(111)-K(2)-H(108)   | 63(3)     |
| O(112)-K(2)-H(108)   | 102(3)    |
| O(108)-K(2)-H(108)   | 11(3)     |
| O(109)-K(2)-H(108)   | 65(3)     |
| O(102)-K(2)-H(108)   | 79(3)     |
| H(105)-K(2)-H(108)   | 78(4)     |
| O(113)-K(2)-H(113)   | 15.1(17)  |
| O(105)-K(2)-H(113)   | 103(3)    |
| O(101)-K(2)-H(113)   | 62.8(17)  |
| O(111)-K(2)-H(113)   | 113.4(19) |
| O(112)-K(2)-H(113)   | 72.9(19)  |
| O(108)-K(2)-H(113)   | 174.0(19) |
| O(109)-K(2)-H(113)   | 117(3)    |
| O(102)-K(2)-H(113)   | 104.9(18) |
| H(105)-K(2)-H(113)   | 103(4)    |
| H(108)-K(2)-H(113)   | 175(3)    |
| C(101)-O(101)-K(2)   | 101.6(3)  |
| C(101)-O(102)-K(2)   | 91.1(3)   |
| C(103)-O(103)-C(107) | 111.2(4)  |
| C(113)-O(104)-C(109) | 116.3(3)  |
| C(113)-O(105)-K(2)   | 164.7(2)  |

|                      |          |
|----------------------|----------|
| C(113)-O(105)-H(105) | 110(10)  |
| K(2)-O(105)-H(105)   | 84(9)    |
| C(119)-O(106)-C(115) | 115.4(3) |
| C(119)-O(107)-H(107) | 109.5    |
| C(121)-O(108)-K(2)   | 107.1(3) |
| C(121)-O(108)-H(108) | 131(10)  |
| K(2)-O(108)-H(108)   | 32(10)   |
| C(123)-O(109)-K(2)   | 104.2(3) |
| C(124)-O(110)-H(110) | 109.5    |
| C(128)-O(111)-C(125) | 110.8(4) |
| C(128)-O(111)-K(2)   | 119.0(3) |
| C(125)-O(111)-K(2)   | 127.6(3) |
| C(129)-O(112)-C(133) | 115.2(4) |
| C(129)-O(112)-K(2)   | 107.6(3) |
| C(133)-O(112)-K(2)   | 108.2(3) |
| C(132)-O(113)-K(2)   | 127.1(3) |
| C(132)-O(113)-H(113) | 125(10)  |
| K(2)-O(113)-H(113)   | 105(10)  |
| O(101)-C(101)-O(102) | 122.9(4) |
| O(101)-C(101)-C(102) | 120.4(4) |
| O(102)-C(101)-C(102) | 116.7(4) |
| C(103)-C(102)-C(101) | 109.4(3) |
| C(103)-C(102)-C(144) | 113.5(4) |
| C(101)-C(102)-C(144) | 113.3(4) |
| C(103)-C(102)-H(102) | 106.7    |
| C(101)-C(102)-H(102) | 106.7    |
| C(144)-C(102)-H(102) | 106.7    |

|                      |          |
|----------------------|----------|
| O(103)-C(103)-C(104) | 110.8(4) |
| O(103)-C(103)-C(102) | 105.7(4) |
| C(104)-C(103)-C(102) | 116.3(4) |
| O(103)-C(103)-H(103) | 107.9    |
| C(104)-C(103)-H(103) | 107.9    |
| C(102)-C(103)-H(103) | 107.9    |
| C(103)-C(104)-C(143) | 111.5(5) |
| C(103)-C(104)-C(105) | 109.4(4) |
| C(143)-C(104)-C(105) | 111.0(5) |
| C(103)-C(104)-H(104) | 108.3    |
| C(143)-C(104)-H(104) | 108.3    |
| C(105)-C(104)-H(104) | 108.3    |
| C(106)-C(105)-C(104) | 111.4(5) |
| C(106)-C(105)-H(10B) | 109.3    |
| C(104)-C(105)-H(10B) | 109.3    |
| C(106)-C(105)-H(10C) | 109.3    |
| C(104)-C(105)-H(10C) | 109.3    |
| H(10B)-C(105)-H(10C) | 108.0    |
| C(105)-C(106)-C(107) | 110.5(4) |
| C(105)-C(106)-H(10D) | 109.6    |
| C(107)-C(106)-H(10D) | 109.6    |
| C(105)-C(106)-H(10E) | 109.6    |
| C(107)-C(106)-H(10E) | 109.6    |
| H(10D)-C(106)-H(10E) | 108.1    |
| O(103)-C(107)-C(108) | 107.7(4) |
| O(103)-C(107)-C(106) | 109.0(4) |
| C(108)-C(107)-C(106) | 116.0(4) |

|                      |          |
|----------------------|----------|
| O(103)-C(107)-H(10F) | 108.0    |
| C(108)-C(107)-H(10F) | 108.0    |
| C(106)-C(107)-H(10F) | 108.0    |
| C(109)-C(108)-C(107) | 113.0(3) |
| C(109)-C(108)-H(10G) | 109.0    |
| C(107)-C(108)-H(10G) | 109.0    |
| C(109)-C(108)-H(10H) | 109.0    |
| C(107)-C(108)-H(10H) | 109.0    |
| H(10G)-C(108)-H(10H) | 107.8    |
| O(104)-C(109)-C(110) | 108.3(4) |
| O(104)-C(109)-C(108) | 104.6(4) |
| C(110)-C(109)-C(108) | 116.9(4) |
| O(104)-C(109)-H(109) | 108.9    |
| C(110)-C(109)-H(109) | 108.9    |
| C(108)-C(109)-H(109) | 108.9    |
| C(109)-C(110)-C(111) | 107.5(4) |
| C(109)-C(110)-C(142) | 113.0(5) |
| C(111)-C(110)-C(142) | 111.5(5) |
| C(109)-C(110)-H(11C) | 108.3    |
| C(111)-C(110)-H(11C) | 108.3    |
| C(142)-C(110)-H(11C) | 108.3    |
| C(112)-C(111)-C(110) | 113.8(4) |
| C(112)-C(111)-H(11D) | 108.8    |
| C(110)-C(111)-H(11D) | 108.8    |
| C(112)-C(111)-H(11E) | 108.8    |
| C(110)-C(111)-H(11E) | 108.8    |
| H(11D)-C(111)-H(11E) | 107.7    |



|                      |          |
|----------------------|----------|
| C(111)-C(112)-C(113) | 111.6(4) |
| C(111)-C(112)-C(141) | 111.3(4) |
| C(113)-C(112)-C(141) | 112.7(4) |
| C(111)-C(112)-H(112) | 106.9    |
| C(113)-C(112)-H(112) | 106.9    |
| C(141)-C(112)-H(112) | 106.9    |
| O(104)-C(113)-O(105) | 110.4(3) |
| O(104)-C(113)-C(112) | 111.1(3) |
| O(105)-C(113)-C(112) | 106.7(3) |
| O(104)-C(113)-C(114) | 103.1(3) |
| O(105)-C(113)-C(114) | 111.3(3) |
| C(112)-C(113)-C(114) | 114.1(4) |
| C(115)-C(114)-C(113) | 115.4(4) |
| C(115)-C(114)-H(11F) | 108.4    |
| C(113)-C(114)-H(11F) | 108.4    |
| C(115)-C(114)-H(11G) | 108.4    |
| C(113)-C(114)-H(11G) | 108.4    |
| H(11F)-C(114)-H(11G) | 107.5    |
| O(106)-C(115)-C(116) | 109.1(3) |
| O(106)-C(115)-C(114) | 105.2(3) |
| C(116)-C(115)-C(114) | 115.8(3) |
| O(106)-C(115)-H(115) | 108.9    |
| C(116)-C(115)-H(115) | 108.9    |
| C(114)-C(115)-H(115) | 108.9    |
| C(115)-C(116)-C(117) | 110.8(4) |
| C(115)-C(116)-C(140) | 111.0(4) |
| C(117)-C(116)-C(140) | 109.2(4) |

|                      |          |
|----------------------|----------|
| C(115)-C(116)-H(116) | 108.6    |
| C(117)-C(116)-H(116) | 108.6    |
| C(140)-C(116)-H(116) | 108.6    |
| C(116)-C(117)-C(118) | 113.3(4) |
| C(116)-C(117)-H(11H) | 108.9    |
| C(118)-C(117)-H(11H) | 108.9    |
| C(116)-C(117)-H(11I) | 108.9    |
| C(118)-C(117)-H(11I) | 108.9    |
| H(11H)-C(117)-H(11I) | 107.7    |
| C(139)-C(118)-C(117) | 111.1(4) |
| C(139)-C(118)-C(119) | 111.9(4) |
| C(117)-C(118)-C(119) | 108.0(4) |
| C(139)-C(118)-H(118) | 108.6    |
| C(117)-C(118)-H(118) | 108.6    |
| C(119)-C(118)-H(118) | 108.6    |
| O(107)-C(119)-O(106) | 110.8(3) |
| O(107)-C(119)-C(118) | 107.9(4) |
| O(106)-C(119)-C(118) | 110.1(3) |
| O(107)-C(119)-C(120) | 111.1(4) |
| O(106)-C(119)-C(120) | 103.3(3) |
| C(118)-C(119)-C(120) | 113.7(4) |
| C(121)-C(120)-C(119) | 113.6(4) |
| C(121)-C(120)-H(12A) | 108.8    |
| C(119)-C(120)-H(12A) | 108.8    |
| C(121)-C(120)-H(12B) | 108.8    |
| C(119)-C(120)-H(12B) | 108.8    |
| H(12A)-C(120)-H(12B) | 107.7    |

|                      |          |
|----------------------|----------|
| O(108)-C(121)-C(120) | 112.1(3) |
| O(108)-C(121)-C(122) | 106.6(4) |
| C(120)-C(121)-C(122) | 112.2(4) |
| O(108)-C(121)-H(121) | 108.6    |
| C(120)-C(121)-H(121) | 108.6    |
| C(122)-C(121)-H(121) | 108.6    |
| C(123)-C(122)-C(138) | 110.6(5) |
| C(123)-C(122)-C(121) | 106.7(4) |
| C(138)-C(122)-C(121) | 110.5(4) |
| C(123)-C(122)-H(122) | 109.7    |
| C(138)-C(122)-H(122) | 109.7    |
| C(121)-C(122)-H(122) | 109.7    |
| O(109)-C(123)-C(124) | 120.7(6) |
| O(109)-C(123)-C(122) | 120.1(5) |
| C(124)-C(123)-C(122) | 119.2(5) |
| O(110)-C(124)-C(125) | 111.1(5) |
| O(110)-C(124)-C(123) | 110.3(4) |
| C(125)-C(124)-C(123) | 112.9(5) |
| O(110)-C(124)-C(137) | 105.3(4) |
| C(125)-C(124)-C(137) | 110.1(5) |
| C(123)-C(124)-C(137) | 106.9(5) |
| O(111)-C(125)-C(124) | 108.2(4) |
| O(111)-C(125)-C(126) | 104.1(5) |
| C(124)-C(125)-C(126) | 116.3(5) |
| O(111)-C(125)-H(125) | 109.3    |
| C(124)-C(125)-H(125) | 109.3    |
| C(126)-C(125)-H(125) | 109.3    |

|                      |          |
|----------------------|----------|
| C(127)-C(126)-C(125) | 102.6(5) |
| C(127)-C(126)-H(12C) | 111.2    |
| C(125)-C(126)-H(12C) | 111.2    |
| C(127)-C(126)-H(12D) | 111.2    |
| C(125)-C(126)-H(12D) | 111.2    |
| H(12C)-C(126)-H(12D) | 109.2    |
| C(126)-C(127)-C(128) | 101.9(5) |
| C(126)-C(127)-H(12E) | 111.4    |
| C(128)-C(127)-H(12E) | 111.4    |
| C(126)-C(127)-H(12F) | 111.4    |
| C(128)-C(127)-H(12F) | 111.4    |
| H(12E)-C(127)-H(12F) | 109.2    |
| O(111)-C(128)-C(136) | 108.8(5) |
| O(111)-C(128)-C(129) | 109.0(4) |
| C(136)-C(128)-C(129) | 109.7(5) |
| O(111)-C(128)-C(127) | 105.9(5) |
| C(136)-C(128)-C(127) | 111.2(6) |
| C(129)-C(128)-C(127) | 112.2(5) |
| O(112)-C(129)-C(130) | 110.1(4) |
| O(112)-C(129)-C(128) | 106.1(4) |
| C(130)-C(129)-C(128) | 115.9(5) |
| O(112)-C(129)-H(129) | 108.2    |
| C(130)-C(129)-H(129) | 108.2    |
| C(128)-C(129)-H(129) | 108.2    |
| C(131)-C(130)-C(129) | 111.5(5) |
| C(131)-C(130)-H(13A) | 109.3    |
| C(129)-C(130)-H(13A) | 109.3    |

|                      |          |
|----------------------|----------|
| C(131)-C(130)-H(13B) | 109.3    |
| C(129)-C(130)-H(13B) | 109.3    |
| H(13A)-C(130)-H(13B) | 108.0    |
| C(130)-C(131)-C(132) | 112.0(4) |
| C(130)-C(131)-H(13C) | 109.2    |
| C(132)-C(131)-H(13C) | 109.2    |
| C(130)-C(131)-H(13D) | 109.2    |
| C(132)-C(131)-H(13D) | 109.2    |
| H(13C)-C(131)-H(13D) | 107.9    |
| O(113)-C(132)-C(135) | 111.1(4) |
| O(113)-C(132)-C(133) | 106.3(4) |
| C(135)-C(132)-C(133) | 113.0(4) |
| O(113)-C(132)-C(131) | 106.1(4) |
| C(135)-C(132)-C(131) | 111.8(4) |
| C(133)-C(132)-C(131) | 108.1(4) |
| O(112)-C(133)-C(134) | 111.5(5) |
| O(112)-C(133)-C(132) | 109.2(4) |
| C(134)-C(133)-C(132) | 115.6(5) |
| O(112)-C(133)-H(133) | 106.7    |
| C(134)-C(133)-H(133) | 106.7    |
| C(132)-C(133)-H(133) | 106.7    |
| C(133)-C(134)-H(13E) | 109.5    |
| C(133)-C(134)-H(13F) | 109.5    |
| H(13E)-C(134)-H(13F) | 109.5    |
| C(133)-C(134)-H(13G) | 109.5    |
| H(13E)-C(134)-H(13G) | 109.5    |
| H(13F)-C(134)-H(13G) | 109.5    |

|                      |       |
|----------------------|-------|
| C(132)-C(135)-H(13H) | 109.5 |
| C(132)-C(135)-H(13I) | 109.5 |
| H(13H)-C(135)-H(13I) | 109.5 |
| C(132)-C(135)-H(13J) | 109.5 |
| H(13H)-C(135)-H(13J) | 109.5 |
| H(13I)-C(135)-H(13J) | 109.5 |
| C(128)-C(136)-H(13K) | 109.5 |
| C(128)-C(136)-H(13L) | 109.5 |
| H(13K)-C(136)-H(13L) | 109.5 |
| C(128)-C(136)-H(13M) | 109.5 |
| H(13K)-C(136)-H(13M) | 109.5 |
| H(13L)-C(136)-H(13M) | 109.5 |
| C(124)-C(137)-H(13N) | 109.5 |
| C(124)-C(137)-H(13O) | 109.5 |
| H(13N)-C(137)-H(13O) | 109.5 |
| C(124)-C(137)-H(13P) | 109.5 |
| H(13N)-C(137)-H(13P) | 109.5 |
| H(13O)-C(137)-H(13P) | 109.5 |
| C(122)-C(138)-H(13Q) | 109.5 |
| C(122)-C(138)-H(13R) | 109.5 |
| H(13Q)-C(138)-H(13R) | 109.5 |
| C(122)-C(138)-H(13S) | 109.5 |
| H(13Q)-C(138)-H(13S) | 109.5 |
| H(13R)-C(138)-H(13S) | 109.5 |
| C(118)-C(139)-H(13T) | 109.5 |
| C(118)-C(139)-H(13U) | 109.5 |
| H(13T)-C(139)-H(13U) | 109.5 |

|                      |       |
|----------------------|-------|
| C(118)-C(139)-H(13V) | 109.5 |
| H(13T)-C(139)-H(13V) | 109.5 |
| H(13U)-C(139)-H(13V) | 109.5 |
| C(116)-C(140)-H(14C) | 109.5 |
| C(116)-C(140)-H(14D) | 109.5 |
| H(14C)-C(140)-H(14D) | 109.5 |
| C(116)-C(140)-H(14E) | 109.5 |
| H(14C)-C(140)-H(14E) | 109.5 |
| H(14D)-C(140)-H(14E) | 109.5 |
| C(112)-C(141)-H(14F) | 109.5 |
| C(112)-C(141)-H(14G) | 109.5 |
| H(14F)-C(141)-H(14G) | 109.5 |
| C(112)-C(141)-H(14H) | 109.5 |
| H(14F)-C(141)-H(14H) | 109.5 |
| H(14G)-C(141)-H(14H) | 109.5 |
| C(110)-C(142)-H(14I) | 109.5 |
| C(110)-C(142)-H(14J) | 109.5 |
| H(14I)-C(142)-H(14J) | 109.5 |
| C(110)-C(142)-H(14K) | 109.5 |
| H(14I)-C(142)-H(14K) | 109.5 |
| H(14J)-C(142)-H(14K) | 109.5 |
| C(104)-C(143)-H(14L) | 109.5 |
| C(104)-C(143)-H(14M) | 109.5 |
| H(14L)-C(143)-H(14M) | 109.5 |
| C(104)-C(143)-H(14N) | 109.5 |
| H(14L)-C(143)-H(14N) | 109.5 |
| H(14M)-C(143)-H(14N) | 109.5 |

|                      |           |
|----------------------|-----------|
| C(102)-C(144)-H(14O) | 109.5     |
| C(102)-C(144)-H(14P) | 109.5     |
| H(14O)-C(144)-H(14P) | 109.5     |
| C(102)-C(144)-H(14Q) | 109.5     |
| H(14O)-C(144)-H(14Q) | 109.5     |
| H(14P)-C(144)-H(14Q) | 109.5     |
| H(201)-O(201)-H(202) | 152(10)   |
| O(202)-C(201)-C(202) | 122.2(9)  |
| O(202)-C(201)-C(203) | 121.7(13) |
| C(202)-C(201)-C(203) | 115.7(11) |
| O(302)-C(301)-C(302) | 117(3)    |
| O(302)-C(301)-C(303) | 125(3)    |
| C(302)-C(301)-C(303) | 118(2)    |
| C(301)-C(302)-H(30C) | 109.5     |
| C(301)-C(302)-H(30D) | 109.5     |
| H(30C)-C(302)-H(30D) | 109.5     |
| C(301)-C(302)-H(30E) | 109.5     |
| H(30C)-C(302)-H(30E) | 109.5     |
| H(30D)-C(302)-H(30E) | 109.5     |
| C(301)-C(303)-H(30F) | 109.5     |
| C(301)-C(303)-H(30G) | 109.5     |
| H(30F)-C(303)-H(30G) | 109.5     |
| C(301)-C(303)-H(30H) | 109.5     |
| H(30F)-C(303)-H(30H) | 109.5     |
| H(30G)-C(303)-H(30H) | 109.5     |

---



Table S5. Anisotropic displacement parameters ( $\text{\AA}^2 \times 10^3$ ) for terrosamycin A (**1**). The anisotropic displacement factor exponent take the form:  $-2\pi^2 [h^2 a^{*2} U^{11} + \dots + 2 h k a^* b^* U^{12}]$ .

|       | $U^{11}$ | $U^{22}$ | $U^{33}$ | $U^{23}$ | $U^{13}$ | $U^{12}$ |
|-------|----------|----------|----------|----------|----------|----------|
| K(1)  | 32(1)    | 40(1)    | 35(1)    | 1(1)     | 2(1)     | -4(1)    |
| O(1)  | 40(2)    | 30(2)    | 36(1)    | 1(1)     | 12(1)    | -1(1)    |
| O(2)  | 54(2)    | 32(2)    | 40(2)    | 4(1)     | 1(2)     | -2(2)    |
| O(3)  | 33(2)    | 36(2)    | 35(1)    | 3(1)     | 3(1)     | -2(1)    |
| O(4)  | 30(2)    | 40(2)    | 34(1)    | 10(1)    | 6(1)     | 0(1)     |
| O(5)  | 32(2)    | 46(2)    | 30(1)    | -4(1)    | 5(1)     | 9(2)     |
| O(6)  | 35(2)    | 33(2)    | 30(1)    | -1(1)    | 11(1)    | 0(1)     |
| O(7)  | 52(2)    | 30(2)    | 29(1)    | 0(1)     | 13(1)    | -2(2)    |
| O(8)  | 32(2)    | 53(2)    | 37(1)    | -1(1)    | 12(1)    | -8(2)    |
| O(9)  | 54(2)    | 47(2)    | 58(2)    | -4(2)    | 12(2)    | -2(2)    |
| O(10) | 51(2)    | 42(2)    | 60(2)    | -5(2)    | 10(2)    | -1(2)    |
| O(11) | 34(2)    | 56(2)    | 42(2)    | -9(2)    | 2(1)     | -13(2)   |
| O(12) | 44(2)    | 36(2)    | 44(2)    | -1(1)    | 9(1)     | 7(2)     |
| O(13) | 78(3)    | 40(2)    | 30(1)    | 0(1)     | 3(2)     | -11(2)   |
| C(1)  | 38(2)    | 33(2)    | 34(2)    | 1(2)     | 18(2)    | -2(2)    |
| C(2)  | 47(3)    | 39(3)    | 31(2)    | -5(2)    | 15(2)    | -8(2)    |
| C(3)  | 59(3)    | 33(2)    | 28(2)    | -3(2)    | 3(2)     | -16(2)   |
| C(4)  | 77(4)    | 45(3)    | 36(2)    | -8(2)    | -3(2)    | -15(3)   |
| C(5)  | 77(5)    | 54(3)    | 54(3)    | -9(3)    | -19(3)   | -15(3)   |
| C(6)  | 34(3)    | 61(4)    | 76(3)    | -1(3)    | -9(3)    | -1(3)    |
| C(7)  | 34(3)    | 42(3)    | 49(2)    | 1(2)     | -1(2)    | -7(2)    |
| C(8)  | 32(3)    | 41(3)    | 73(3)    | 9(2)     | 14(2)    | 4(2)     |

|       |       |       |       |       |        |        |
|-------|-------|-------|-------|-------|--------|--------|
| C(9)  | 31(2) | 38(2) | 41(2) | 12(2) | 14(2)  | 7(2)   |
| C(10) | 70(4) | 53(3) | 50(3) | 18(2) | 29(3)  | 11(3)  |
| C(11) | 71(4) | 70(4) | 35(2) | 18(2) | 23(2)  | 26(3)  |
| C(12) | 54(3) | 68(3) | 23(2) | 10(2) | 12(2)  | 24(3)  |
| C(13) | 25(2) | 49(3) | 25(2) | 4(2)  | 8(2)   | 4(2)   |
| C(14) | 35(2) | 36(2) | 28(2) | -4(2) | 10(2)  | 0(2)   |
| C(15) | 40(3) | 29(2) | 26(2) | 0(2)  | 8(2)   | 7(2)   |
| C(16) | 45(3) | 49(3) | 37(2) | 1(2)  | 8(2)   | 11(2)  |
| C(17) | 58(3) | 42(3) | 30(2) | 5(2)  | 2(2)   | 19(2)  |
| C(18) | 58(3) | 42(3) | 24(2) | 4(2)  | 14(2)  | 5(2)   |
| C(19) | 50(3) | 30(2) | 28(2) | 6(2)  | 15(2)  | 6(2)   |
| C(20) | 50(3) | 41(3) | 36(2) | 2(2)  | 23(2)  | -5(2)  |
| C(21) | 33(2) | 36(2) | 40(2) | -1(2) | 18(2)  | -4(2)  |
| C(22) | 35(3) | 54(3) | 46(2) | 0(2)  | 16(2)  | -11(2) |
| C(23) | 26(2) | 43(3) | 56(2) | -2(2) | 16(2)  | -6(2)  |
| C(24) | 28(2) | 47(3) | 58(3) | -4(2) | 8(2)   | -4(2)  |
| C(25) | 24(2) | 51(3) | 58(3) | -3(2) | 0(2)   | -6(2)  |
| C(26) | 44(3) | 76(4) | 72(3) | -4(3) | -1(3)  | -27(3) |
| C(27) | 58(4) | 86(5) | 51(3) | -9(3) | -11(3) | -28(4) |
| C(28) | 49(3) | 48(3) | 44(2) | -6(2) | 7(2)   | -9(3)  |
| C(29) | 34(3) | 52(3) | 33(2) | -9(2) | 2(2)   | -4(2)  |
| C(30) | 28(3) | 60(3) | 52(3) | 4(2)  | -8(2)  | 4(2)   |
| C(31) | 61(4) | 54(3) | 44(2) | 0(2)  | 6(2)   | 12(3)  |
| C(32) | 66(4) | 40(3) | 27(2) | 1(2)  | 7(2)   | 0(3)   |
| C(33) | 42(3) | 46(3) | 43(2) | 0(2)  | 5(2)   | 0(2)   |
| C(34) | 94(5) | 63(4) | 59(3) | -1(3) | 37(3)  | 1(4)   |
| C(35) | 84(4) | 42(3) | 43(2) | 6(2)  | 9(3)   | -3(3)  |

|        |        |       |       |        |       |        |
|--------|--------|-------|-------|--------|-------|--------|
| C(36)  | 82(5)  | 46(3) | 63(3) | -14(3) | 22(3) | -14(3) |
| C(37)  | 34(3)  | 61(4) | 74(3) | 7(3)   | 7(3)  | -10(3) |
| C(38)  | 47(3)  | 93(5) | 60(3) | -15(3) | 26(3) | -12(3) |
| C(39)  | 76(4)  | 65(4) | 33(2) | 16(2)  | 23(2) | 9(3)   |
| C(40)  | 54(4)  | 82(4) | 50(3) | 13(3)  | 12(3) | 32(3)  |
| C(41)  | 75(4)  | 71(4) | 33(2) | -14(2) | 6(2)  | 14(3)  |
| C(42)  | 130(7) | 70(4) | 68(3) | 26(3)  | 51(4) | -2(4)  |
| C(43)  | 115(6) | 87(5) | 30(2) | -8(3)  | 4(3)  | -27(4) |
| C(44)  | 52(3)  | 38(3) | 51(2) | -8(2)  | 13(2) | -2(2)  |
| K(2)   | 44(1)  | 40(1) | 32(1) | 2(1)   | 2(1)  | 0(1)   |
| O(101) | 53(2)  | 33(2) | 55(2) | 1(2)   | 1(2)  | -5(2)  |
| O(102) | 38(2)  | 30(2) | 39(1) | 2(1)   | 9(1)  | 4(1)   |
| O(103) | 38(2)  | 39(2) | 31(1) | 0(1)   | 2(1)  | -2(2)  |
| O(104) | 36(2)  | 34(2) | 26(1) | 1(1)   | 7(1)  | -7(1)  |
| O(105) | 35(2)  | 40(2) | 21(1) | -3(1)  | 2(1)  | 6(1)   |
| O(106) | 29(2)  | 33(2) | 30(1) | 4(1)   | 8(1)  | 0(1)   |
| O(107) | 32(2)  | 39(2) | 49(2) | 3(1)   | 17(1) | 7(1)   |
| O(108) | 43(2)  | 60(2) | 26(1) | 3(1)   | 12(1) | 2(2)   |
| O(109) | 110(4) | 40(2) | 57(2) | -4(2)  | 25(2) | 3(2)   |
| O(110) | 66(3)  | 36(2) | 45(2) | -1(1)  | 12(2) | 3(2)   |
| O(111) | 53(2)  | 63(2) | 37(2) | 14(2)  | -3(2) | -1(2)  |
| O(112) | 48(2)  | 33(2) | 47(2) | -4(1)  | 1(2)  | 1(2)   |
| O(113) | 43(2)  | 37(2) | 64(2) | 3(2)   | 8(2)  | 3(2)   |
| C(101) | 44(3)  | 38(3) | 27(2) | 3(2)   | 16(2) | -4(2)  |
| C(102) | 36(3)  | 33(2) | 49(2) | 6(2)   | 19(2) | 4(2)   |
| C(103) | 27(2)  | 40(3) | 52(2) | 10(2)  | 1(2)  | -3(2)  |
| C(104) | 30(3)  | 49(3) | 72(3) | 10(3)  | 3(2)  | 8(2)   |

|        |       |        |       |        |        |        |
|--------|-------|--------|-------|--------|--------|--------|
| C(105) | 52(4) | 59(4)  | 78(4) | 15(3)  | -27(3) | 8(3)   |
| C(106) | 65(4) | 53(3)  | 42(2) | 7(2)   | -12(2) | 5(3)   |
| C(107) | 56(3) | 38(3)  | 30(2) | 2(2)   | -5(2)  | -1(2)  |
| C(108) | 58(3) | 36(2)  | 28(2) | 4(2)   | 6(2)   | -9(2)  |
| C(109) | 44(3) | 36(2)  | 28(2) | -2(2)  | 11(2)  | -13(2) |
| C(110) | 60(3) | 44(3)  | 50(2) | -3(2)  | 30(2)  | -10(3) |
| C(111) | 38(3) | 51(3)  | 65(3) | -9(2)  | 30(2)  | -3(3)  |
| C(112) | 33(2) | 44(3)  | 52(2) | -16(2) | 19(2)  | -9(2)  |
| C(113) | 30(2) | 35(2)  | 27(2) | -5(2)  | 6(2)   | 3(2)   |
| C(114) | 36(2) | 34(2)  | 26(2) | 3(2)   | 12(2)  | 0(2)   |
| C(115) | 29(2) | 38(2)  | 26(2) | 6(2)   | 9(2)   | 6(2)   |
| C(116) | 38(3) | 34(2)  | 36(2) | 3(2)   | 2(2)   | 0(2)   |
| C(117) | 34(3) | 41(3)  | 52(2) | -3(2)  | 0(2)   | -4(2)  |
| C(118) | 35(3) | 30(2)  | 64(3) | -1(2)  | 15(2)  | -6(2)  |
| C(119) | 28(2) | 32(2)  | 42(2) | 6(2)   | 15(2)  | -4(2)  |
| C(120) | 45(3) | 44(3)  | 40(2) | 4(2)   | 19(2)  | 4(2)   |
| C(121) | 56(3) | 43(3)  | 30(2) | 7(2)   | 23(2)  | 11(2)  |
| C(122) | 60(3) | 50(3)  | 32(2) | 10(2)  | 22(2)  | 7(3)   |
| C(123) | 81(4) | 47(3)  | 24(2) | 0(2)   | 20(2)  | 1(3)   |
| C(124) | 86(4) | 49(3)  | 23(2) | 3(2)   | 12(2)  | -7(3)  |
| C(125) | 76(4) | 61(4)  | 34(2) | 10(2)  | -3(2)  | 1(3)   |
| C(126) | 87(5) | 75(4)  | 73(4) | 37(4)  | -28(4) | -16(4) |
| C(127) | 75(5) | 100(6) | 73(4) | 36(4)  | -23(4) | 0(4)   |
| C(128) | 50(3) | 42(3)  | 55(3) | 8(2)   | -13(2) | -5(3)  |
| C(129) | 40(3) | 44(3)  | 64(3) | 3(2)   | -8(2)  | -4(2)  |
| C(130) | 67(4) | 56(3)  | 42(2) | -9(2)  | -10(2) | -7(3)  |
| C(131) | 50(3) | 53(3)  | 61(3) | -13(3) | -11(3) | -7(3)  |

|        |         |        |        |        |        |        |
|--------|---------|--------|--------|--------|--------|--------|
| C(132) | 43(3)   | 33(2)  | 53(2)  | 1(2)   | -1(2)  | -5(2)  |
| C(133) | 42(3)   | 39(3)  | 55(3)  | -7(2)  | 9(2)   | 0(2)   |
| C(134) | 66(4)   | 63(4)  | 113(5) | -3(4)  | 38(4)  | 1(4)   |
| C(135) | 49(3)   | 47(3)  | 92(4)  | -3(3)  | 13(3)  | -3(3)  |
| C(136) | 68(4)   | 34(3)  | 121(5) | -2(3)  | 9(4)   | 5(3)   |
| C(137) | 136(7)  | 65(4)  | 32(2)  | 11(2)  | 22(3)  | -5(4)  |
| C(138) | 89(5)   | 89(5)  | 42(2)  | 8(3)   | 36(3)  | 27(4)  |
| C(139) | 40(3)   | 59(4)  | 90(4)  | -9(3)  | 27(3)  | -20(3) |
| C(140) | 51(3)   | 72(4)  | 34(2)  | 6(2)   | -2(2)  | -6(3)  |
| C(141) | 36(3)   | 56(3)  | 73(3)  | -5(3)  | 7(3)   | 11(3)  |
| C(142) | 77(5)   | 64(4)  | 86(4)  | 1(3)   | 45(4)  | -23(4) |
| C(143) | 29(3)   | 90(5)  | 118(5) | 11(4)  | 7(3)   | 18(3)  |
| C(144) | 65(4)   | 40(3)  | 59(3)  | 4(2)   | 23(3)  | 13(3)  |
| O(201) | 52(2)   | 33(2)  | 46(2)  | -3(1)  | 6(2)   | -2(2)  |
| O(202) | 188(10) | 116(6) | 62(4)  | 10(4)  | 7(4)   | 17(6)  |
| C(201) | 88(7)   | 86(7)  | 42(4)  | -8(4)  | 25(4)  | -6(6)  |
| C(202) | 97(7)   | 67(7)  | 77(7)  | -19(5) | 34(6)  | -22(6) |
| C(203) | 260(20) | 90(13) | 59(5)  | -6(14) | 28(12) | 46(16) |
| O(302) | 188(10) | 116(6) | 62(4)  | 10(4)  | 7(4)   | 17(6)  |
| C(301) | 88(7)   | 86(7)  | 42(4)  | -8(4)  | 25(4)  | -6(6)  |
| C(302) | 97(7)   | 67(7)  | 77(7)  | -19(5) | 34(6)  | -22(6) |
| C(303) | 260(20) | 90(13) | 59(5)  | -6(14) | 28(12) | 46(16) |

---

Table S6. Hydrogen coordinates ( $\times 10^4$ ) and isotropic displacement parameters ( $\text{\AA}^2 \times 10^3$ ) for terrosamycin A (**1**).

|        | x     | y    | z     | U(eq) |
|--------|-------|------|-------|-------|
| H(7)   | 9552  | 7482 | 12058 | 54    |
| H(10)  | 5690  | 6511 | 9126  | 78    |
| H(2)   | 9290  | 8317 | 12453 | 46    |
| H(3)   | 10892 | 7982 | 12404 | 50    |
| H(4)   | 11698 | 8727 | 13022 | 66    |
| H(5A)  | 12908 | 8046 | 13724 | 81    |
| H(5B)  | 13406 | 8459 | 14022 | 81    |
| H(6A)  | 13445 | 8568 | 12109 | 73    |
| H(6B)  | 14086 | 8178 | 12479 | 73    |
| H(7A)  | 12398 | 7847 | 11633 | 53    |
| H(8A)  | 12875 | 8352 | 9970  | 58    |
| H(8B)  | 13523 | 7963 | 10320 | 58    |
| H(9)   | 11128 | 8029 | 9268  | 43    |
| H(10A) | 12852 | 7711 | 8248  | 66    |
| H(11A) | 11349 | 7586 | 6673  | 68    |
| H(11B) | 10453 | 7776 | 7290  | 68    |
| H(12)  | 11642 | 7087 | 7947  | 57    |
| H(14A) | 11808 | 6834 | 9862  | 39    |
| H(14B) | 10462 | 6754 | 9463  | 39    |
| H(15)  | 11166 | 7231 | 11389 | 38    |
| H(16)  | 11500 | 6440 | 11637 | 53    |

|        |       |      |       |     |
|--------|-------|------|-------|-----|
| H(17A) | 11805 | 6545 | 13634 | 54  |
| H(17B) | 11624 | 6985 | 13433 | 54  |
| H(18)  | 9891  | 6432 | 12747 | 49  |
| H(20A) | 7855  | 6920 | 12542 | 48  |
| H(20B) | 8042  | 6621 | 11618 | 48  |
| H(21)  | 7623  | 7394 | 11067 | 42  |
| H(22)  | 5974  | 6797 | 10734 | 53  |
| H(25)  | 4296  | 7401 | 7528  | 56  |
| H(26A) | 4297  | 6674 | 6533  | 80  |
| H(26B) | 3249  | 6968 | 6346  | 80  |
| H(27A) | 4029  | 7343 | 5186  | 82  |
| H(27B) | 4398  | 6936 | 4820  | 82  |
| H(29)  | 6079  | 7519 | 4644  | 49  |
| H(30A) | 4745  | 7906 | 5188  | 60  |
| H(30B) | 5557  | 7956 | 6446  | 60  |
| H(31A) | 5759  | 8487 | 5423  | 65  |
| H(31B) | 5983  | 8245 | 4376  | 65  |
| H(33)  | 8738  | 7901 | 6042  | 53  |
| H(34A) | 8278  | 7555 | 4294  | 104 |
| H(34B) | 8599  | 7983 | 4143  | 104 |
| H(34C) | 7286  | 7853 | 3809  | 104 |
| H(35A) | 7687  | 8830 | 5620  | 86  |
| H(35B) | 7853  | 8598 | 4533  | 86  |
| H(35C) | 8823  | 8586 | 5706  | 86  |
| H(36A) | 7299  | 6941 | 6319  | 94  |
| H(36B) | 6491  | 6826 | 5106  | 94  |
| H(36C) | 6247  | 6661 | 6263  | 94  |

|        |       |      |       |     |
|--------|-------|------|-------|-----|
| H(37A) | 3542  | 6646 | 8343  | 86  |
| H(37B) | 3396  | 7041 | 8917  | 86  |
| H(37C) | 4110  | 6713 | 9674  | 86  |
| H(38A) | 6029  | 7138 | 12429 | 96  |
| H(38B) | 4868  | 7249 | 11522 | 96  |
| H(38C) | 5944  | 7526 | 11751 | 96  |
| H(39A) | 10277 | 6539 | 14734 | 85  |
| H(39B) | 9039  | 6707 | 14154 | 85  |
| H(39C) | 10120 | 6980 | 14534 | 85  |
| H(40A) | 13159 | 6704 | 11341 | 93  |
| H(40B) | 13388 | 6597 | 12669 | 93  |
| H(40C) | 13145 | 7022 | 12275 | 93  |
| H(41A) | 9244  | 7204 | 7166  | 91  |
| H(41B) | 9834  | 6809 | 7557  | 91  |
| H(41C) | 10044 | 7012 | 6438  | 91  |
| H(42A) | 12372 | 8199 | 6840  | 127 |
| H(42B) | 12943 | 8364 | 8082  | 127 |
| H(42C) | 11584 | 8389 | 7582  | 127 |
| H(43A) | 11209 | 8153 | 14516 | 120 |
| H(43B) | 10418 | 8512 | 14135 | 120 |
| H(43C) | 11685 | 8560 | 14928 | 120 |
| H(44A) | 9810  | 8931 | 12370 | 70  |
| H(44B) | 8732  | 8861 | 11314 | 70  |
| H(44C) | 9998  | 8881 | 11105 | 70  |
| H(107) | 5903  | 5314 | 2173  | 58  |
| H(110) | 1067  | 6145 | -1036 | 74  |
| H(102) | 5467  | 4404 | 2236  | 45  |



|        |      |      |       |     |
|--------|------|------|-------|-----|
| H(103) | 5439 | 4731 | 3884  | 49  |
| H(104) | 6138 | 3986 | 4583  | 62  |
| H(10B) | 7175 | 4246 | 6306  | 84  |
| H(10C) | 6849 | 4662 | 5852  | 84  |
| H(10D) | 5663 | 4510 | 7057  | 69  |
| H(10E) | 5296 | 4124 | 6400  | 69  |
| H(10F) | 4725 | 4848 | 5405  | 52  |
| H(10G) | 3147 | 4322 | 5943  | 50  |
| H(10H) | 3490 | 4709 | 6599  | 50  |
| H(109) | 2285 | 4642 | 4248  | 43  |
| H(11C) | 1437 | 4970 | 6056  | 58  |
| H(11D) | 311  | 4893 | 3678  | 58  |
| H(11E) | -228 | 5094 | 4616  | 58  |
| H(112) | 1039 | 5580 | 4804  | 50  |
| H(11F) | 2491 | 5906 | 3478  | 38  |
| H(11G) | 2883 | 5850 | 4833  | 38  |
| H(115) | 4364 | 5429 | 4159  | 37  |
| H(116) | 4687 | 6208 | 4687  | 44  |
| H(11H) | 6465 | 5674 | 4690  | 53  |
| H(11I) | 6658 | 6109 | 4982  | 53  |
| H(118) | 5823 | 6272 | 3076  | 51  |
| H(12A) | 4670 | 6109 | 1114  | 50  |
| H(12B) | 5576 | 5805 | 911   | 50  |
| H(121) | 4081 | 5341 | 703   | 49  |
| H(122) | 3836 | 5933 | -970  | 55  |
| H(125) | 489  | 5389 | -2655 | 72  |
| H(12C) | -364 | 6129 | -2443 | 104 |

|        |       |      |       |     |
|--------|-------|------|-------|-----|
| H(12D) | -633  | 5867 | -3567 | 104 |
| H(12E) | -1823 | 5480 | -2827 | 107 |
| H(12F) | -2122 | 5882 | -2360 | 107 |
| H(129) | -2315 | 5266 | -811  | 63  |
| H(13A) | -1839 | 4906 | -2242 | 71  |
| H(13B) | -577  | 4831 | -1465 | 71  |
| H(13C) | -1668 | 4305 | -1374 | 70  |
| H(13D) | -2659 | 4550 | -1047 | 70  |
| H(133) | -908  | 4821 | 1767  | 55  |
| H(13E) | -2651 | 5184 | 1295  | 117 |
| H(13F) | -2777 | 4759 | 1659  | 117 |
| H(13G) | -3134 | 4876 | 336   | 117 |
| H(13H) | -1496 | 3912 | 474   | 95  |
| H(13I) | -2524 | 4157 | 725   | 95  |
| H(13J) | -1338 | 4125 | 1673  | 95  |
| H(13K) | -570  | 5811 | 527   | 115 |
| H(13L) | -1791 | 5937 | -241  | 115 |
| H(13M) | -639  | 6114 | -464  | 115 |
| H(13N) | 1331  | 6108 | -3390 | 116 |
| H(13O) | 1990  | 5728 | -3518 | 116 |
| H(13P) | 2674  | 6071 | -2816 | 116 |
| H(13Q) | 4772  | 5193 | -874  | 105 |
| H(13R) | 5453  | 5575 | -925  | 105 |
| H(13S) | 4520  | 5434 | -2030 | 105 |
| H(13T) | 7513  | 5706 | 3159  | 92  |
| H(13U) | 7788  | 6136 | 3463  | 92  |
| H(13V) | 7186  | 6016 | 2177  | 92  |

|        |      |      |      |     |
|--------|------|------|------|-----|
| H(14C) | 4357 | 5837 | 6251 | 81  |
| H(14D) | 5624 | 6009 | 6561 | 81  |
| H(14E) | 5431 | 5580 | 6190 | 81  |
| H(14F) | 567  | 5839 | 2915 | 84  |
| H(14G) | -528 | 5671 | 3281 | 84  |
| H(14H) | 59   | 5443 | 2428 | 84  |
| H(14I) | 638  | 4292 | 4846 | 107 |
| H(14J) | 19   | 4491 | 5729 | 107 |
| H(14K) | 1272 | 4315 | 6177 | 107 |
| H(14L) | 7231 | 4177 | 3345 | 121 |
| H(14M) | 8040 | 4218 | 4606 | 121 |
| H(14N) | 7449 | 4580 | 3933 | 121 |
| H(14O) | 5412 | 3782 | 2790 | 80  |
| H(14P) | 4403 | 3849 | 1669 | 80  |
| H(14Q) | 4116 | 3826 | 2901 | 80  |
| H(20C) | 6530 | 8486 | 142  | 117 |
| H(20D) | 5248 | 8424 | 277  | 117 |
| H(20E) | 6293 | 8209 | 1104 | 117 |
| H(20F) | 5233 | 9161 | 561  | 208 |
| H(20G) | 6546 | 9170 | 486  | 208 |
| H(20H) | 6198 | 9322 | 1608 | 208 |
| H(30C) | 5589 | 8460 | 1570 | 117 |
| H(30D) | 6836 | 8616 | 1561 | 117 |
| H(30E) | 6021 | 8454 | 409  | 117 |
| H(30F) | 5920 | 9520 | 780  | 208 |
| H(30G) | 6901 | 9255 | 517  | 208 |
| H(30H) | 6767 | 9301 | 1803 | 208 |

|        |           |          |            |     |
|--------|-----------|----------|------------|-----|
| H(5)   | 9480(110) | 7630(30) | 8700(100)  | 208 |
| H(8)   | 8360(50)  | 7030(40) | 10070(110) | 208 |
| H(13)  | 7720(130) | 8460(30) | 7420(100)  | 208 |
| H(105) | 2730(80)  | 5100(40) | 2870(110)  | 208 |
| H(108) | 2210(70)  | 5600(40) | 560(110)   | 208 |
| H(113) | 350(110)  | 4260(30) | 640(110)   | 208 |
| H(201) | 8050(90)  | 9010(40) | 8330(110)  | 208 |
| H(202) | 9450(70)  | 8840(50) | 8560(120)  | 208 |

---

Table S7. Hydrogen bonds for terrosamycin A (**1**) [ $\text{\AA}$  and  $^\circ$ ].

| D-H...A                  | d(D-H)  | d(H...A) | d(D...A)  | $\angle(\text{DHA})$ |
|--------------------------|---------|----------|-----------|----------------------|
| O(7)-H(7)...O(1)         | 0.84    | 1.82     | 2.660(4)  | 175.6                |
| C(21)-H(21)...O(1)       | 1.00    | 2.38     | 3.165(5)  | 134.9                |
| C(35)-H(35B)...O(202)    | 0.98    | 2.60     | 3.490(9)  | 151.9                |
| C(121)-H(121)...O(102)   | 1.00    | 2.38     | 3.192(5)  | 138.0                |
| C(135)-H(131)...O(302)#1 | 0.98    | 2.61     | 3.48(2)   | 148.0                |
| C(202)-H(20C)...O(2)#2   | 0.98    | 2.60     | 3.400(13) | 138.9                |
| C(303)-H(30G)...O(101)#3 | 0.98    | 2.57     | 3.37(7)   | 139.8                |
| O(8)-H(8)...O(6)         | 0.81(6) | 1.86(7)  | 2.641(4)  | 161(14)              |
| O(13)-H(13)...O(201)     | 0.81(6) | 2.04(8)  | 2.811(5)  | 160(15)              |
| O(105)-H(105)...O(102)   | 0.81(6) | 1.91(8)  | 2.664(4)  | 155(13)              |
| O(113)-H(113)...O(201)#4 | 0.81(6) | 2.01(7)  | 2.797(5)  | 164(14)              |
| O(201)-H(201)...O(101)#5 | 0.90(9) | 1.85(10) | 2.712(5)  | 161(14)              |

Symmetry transformations used to generate equivalent atoms:

#1  $-x, y-1/2, -z$  #2  $x, y, z-1$  #3  $-x+1, y+1/2, -z$

#4  $-x+1, y-1/2, -z+1$  #5  $-x+1, y+1/2, -z+1$
